# Supplementary material for: From pico to nano: biofunctionalization of cube-octameric silsesquioxanes by peptides and miniproteins
Source: Royal Society of Chemistry journal article supplement (doi:10.1039/c2ob25728a), 2012-01-01
Supplement: c2ob25728a.pdf [file c2ob25728a.pdf]

# From Pico to Nano: Biofunctionalization of Cube-octameric Silsesquioxanes by Peptides and Miniproteins

Sebastian Fabritz,<sup>‡</sup> Sebastian Hörner,<sup>‡</sup> Doreen Könning, Martin Empting, Michael Reinwarth, Christian Dietz, Bernhard Glotzbach, Holm Frauendorf, Harald Kolmar\* and Olga Avrutina

## Electronic Supplemental Information

**Fig. S1:** HR-MS spectrum of **2**.

**Fig. S2:** HR-MS spectrum of **3**.

**Fig. S3:** ATR-IR spectrum of **2**.

**Fig. S4:** ATR-IR spectrum of **3**.

**Fig. S5:** (a) <sup>1</sup>H-NMR of **2**, (b) <sup>1</sup>H-NMR of **3**.

**Fig. S6:** (a) <sup>29</sup>Si-NMR of **2**, (b) <sup>29</sup>Si-NMR of **3**, the NMR spectra were base-line corrected using MestReNova.

**Fig. S7:** AFM image of aggregated and randomly distributed COSS particles **1**.

**Fig. S8:** (a) proposed structure of reaction intermediates in the synthesis of **6**. (b) ESI-MS spectrum of the reaction mixture after 30 min.

**Fig. S9:** (a) unprotected aminooxy COSS particle, (b) periodate oxidized **p4**, (c) possible conjugation products **4**.

**Fig. S10:** LC-MS monitoring of the synthesis of **4**: analysis after overnight reaction.

**Fig. S11:** Synthesis of **4**: deconvoluted ESI MS spectrum of the reaction mixture.

**Fig. S12:** 3D representation (sticks) of compound **4**.

**Fig. S13:** (a) unprotected aminooxy COSS particle, (b) periodate oxidized **p5**, (c) possible conjugation products **5**.

**Fig. S14:** LC-MS monitoring of the synthesis of **5**: analysis after overnight reaction.

**Fig. S15:** Synthesis of **5**: deconvoluted ESI MS spectrum of the reaction mixture.

**Fig. S16:** (a) unprotected aminooxy COSS particle, (b) periodate oxidized **p6**, (c) possible conjugation products **6**.

**Fig. S17:** LC-MS monitoring of the synthesis of **6**: analysis after overnight reaction.

**Fig. S18:** Synthesis of **6**: deconvoluted ESI MS spectrum of the reaction mixture.

**Fig. S19:** (a) unprotected aminooxy COSS particle, (b) periodate oxidized **p7**, (c) possible conjugation products **7**.

**Fig. S20:** LC-MS monitoring of the synthesis of **7**: analysis after overnight reaction.

**Fig. S21:** Synthesis of **7**: deconvoluted ESI MS spectrum of the reaction mixture.

**Fig. S22:** (a) unprotected aminooxy COSS particle, (b) periodate oxidized **p8**, (c) possible conjugation products **8**.

**Fig. S23:** LC-MS monitoring of the synthesis of **8**: analysis after overnight reaction.

**Fig. S24:** Synthesis of **8**: deconvoluted ESI MS spectrum of the reaction mixture.

**Fig. S25:** (a) unprotected aminooxy COSS particle, (b) periodate oxidized **p9**, (c) possible conjugation products **9**.

**Fig. S26:** LC-MS monitoring of the synthesis of **9**: analysis after overnight reaction.

**Fig. S27:** Synthesis of **9**: deconvoluted ESI MS spectrum of the reaction mixture.

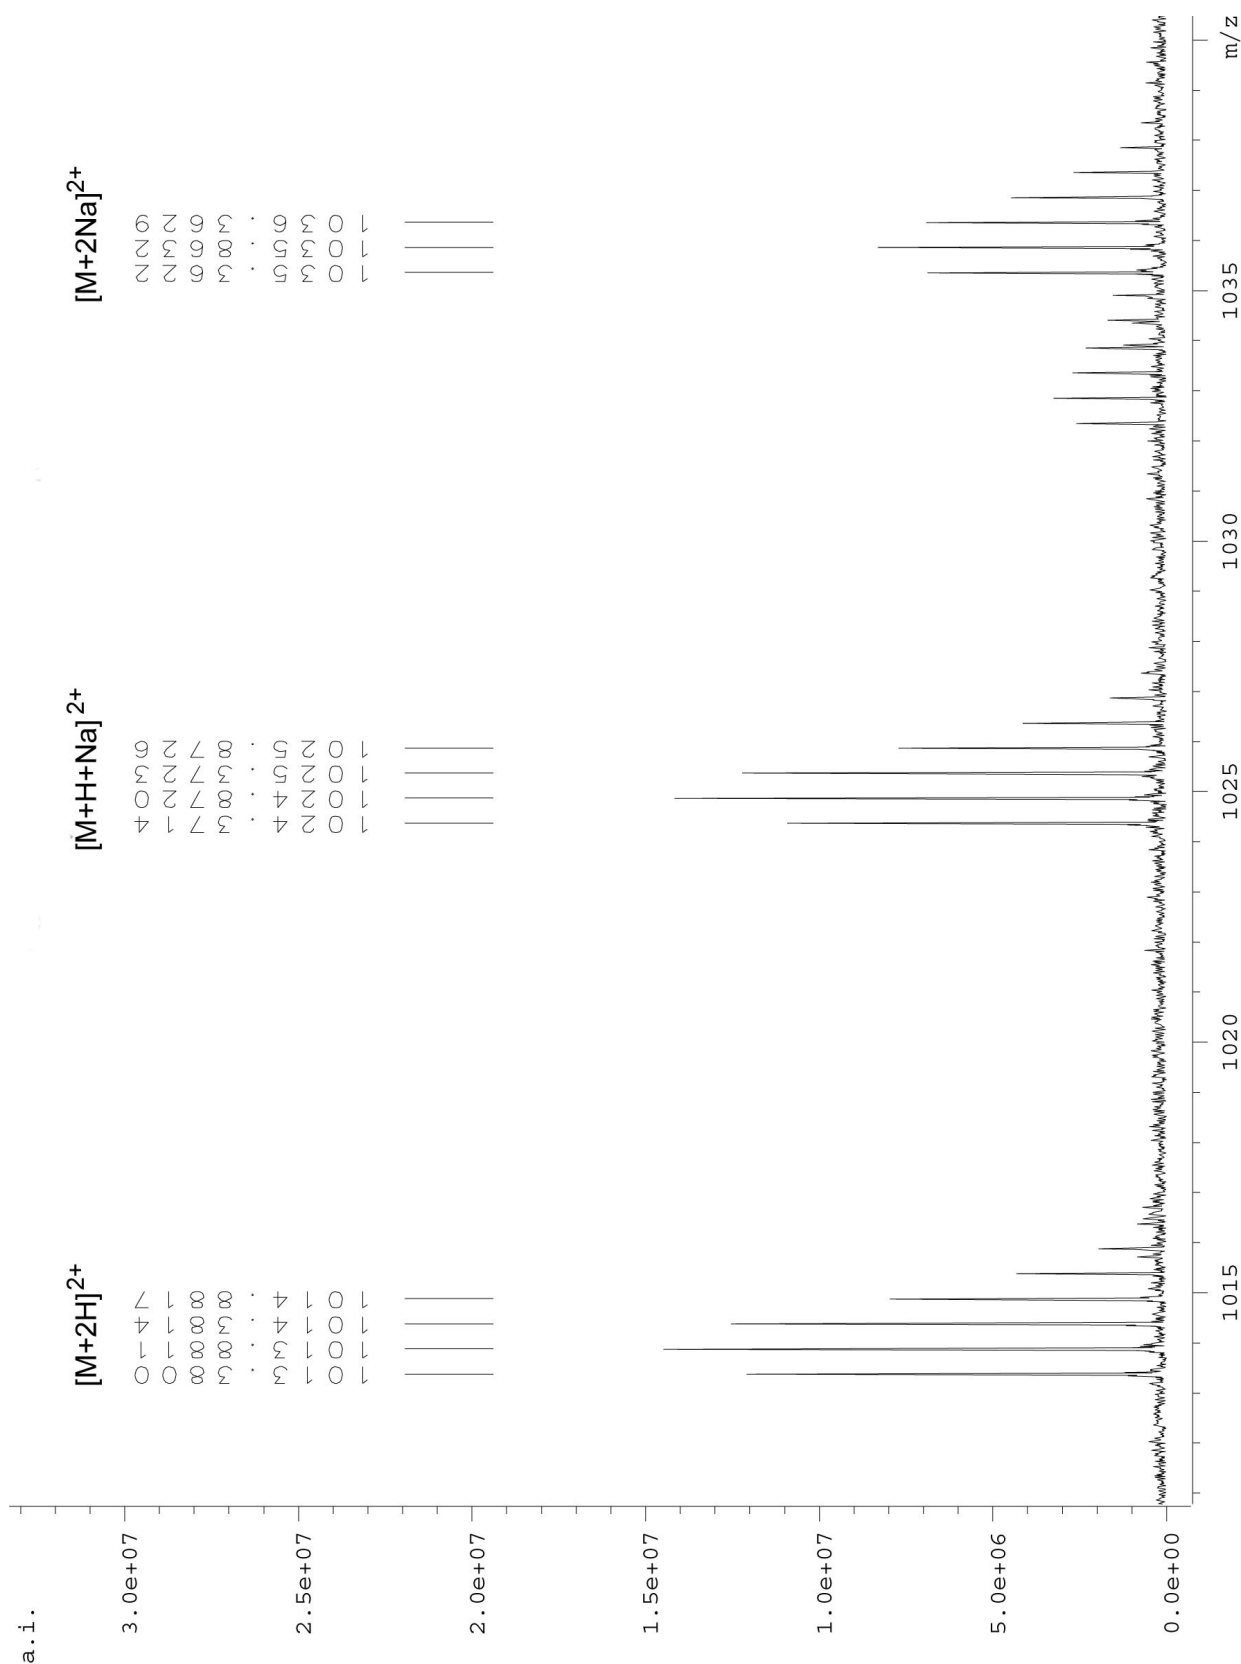

Fig. S1: HR-MS spectrum of 2.

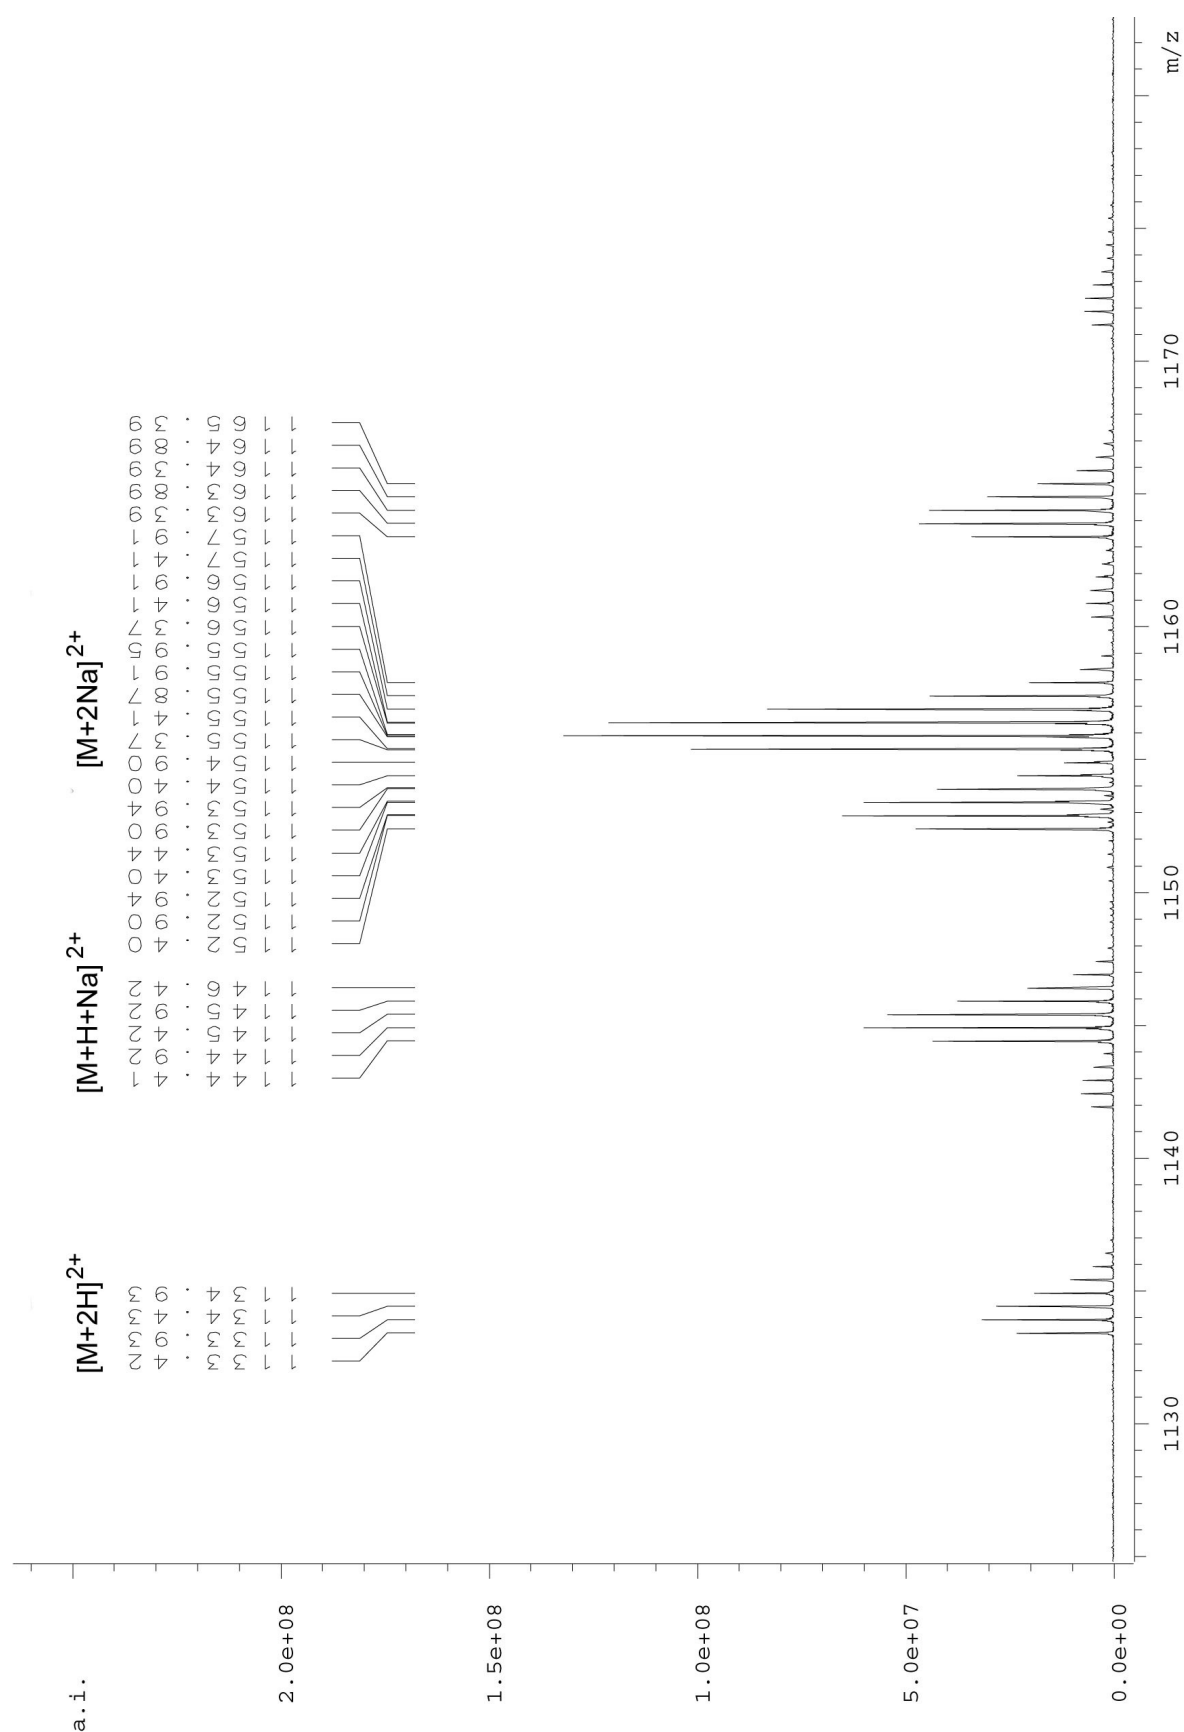

Fig. S2: HR-MS spectrum of 3.

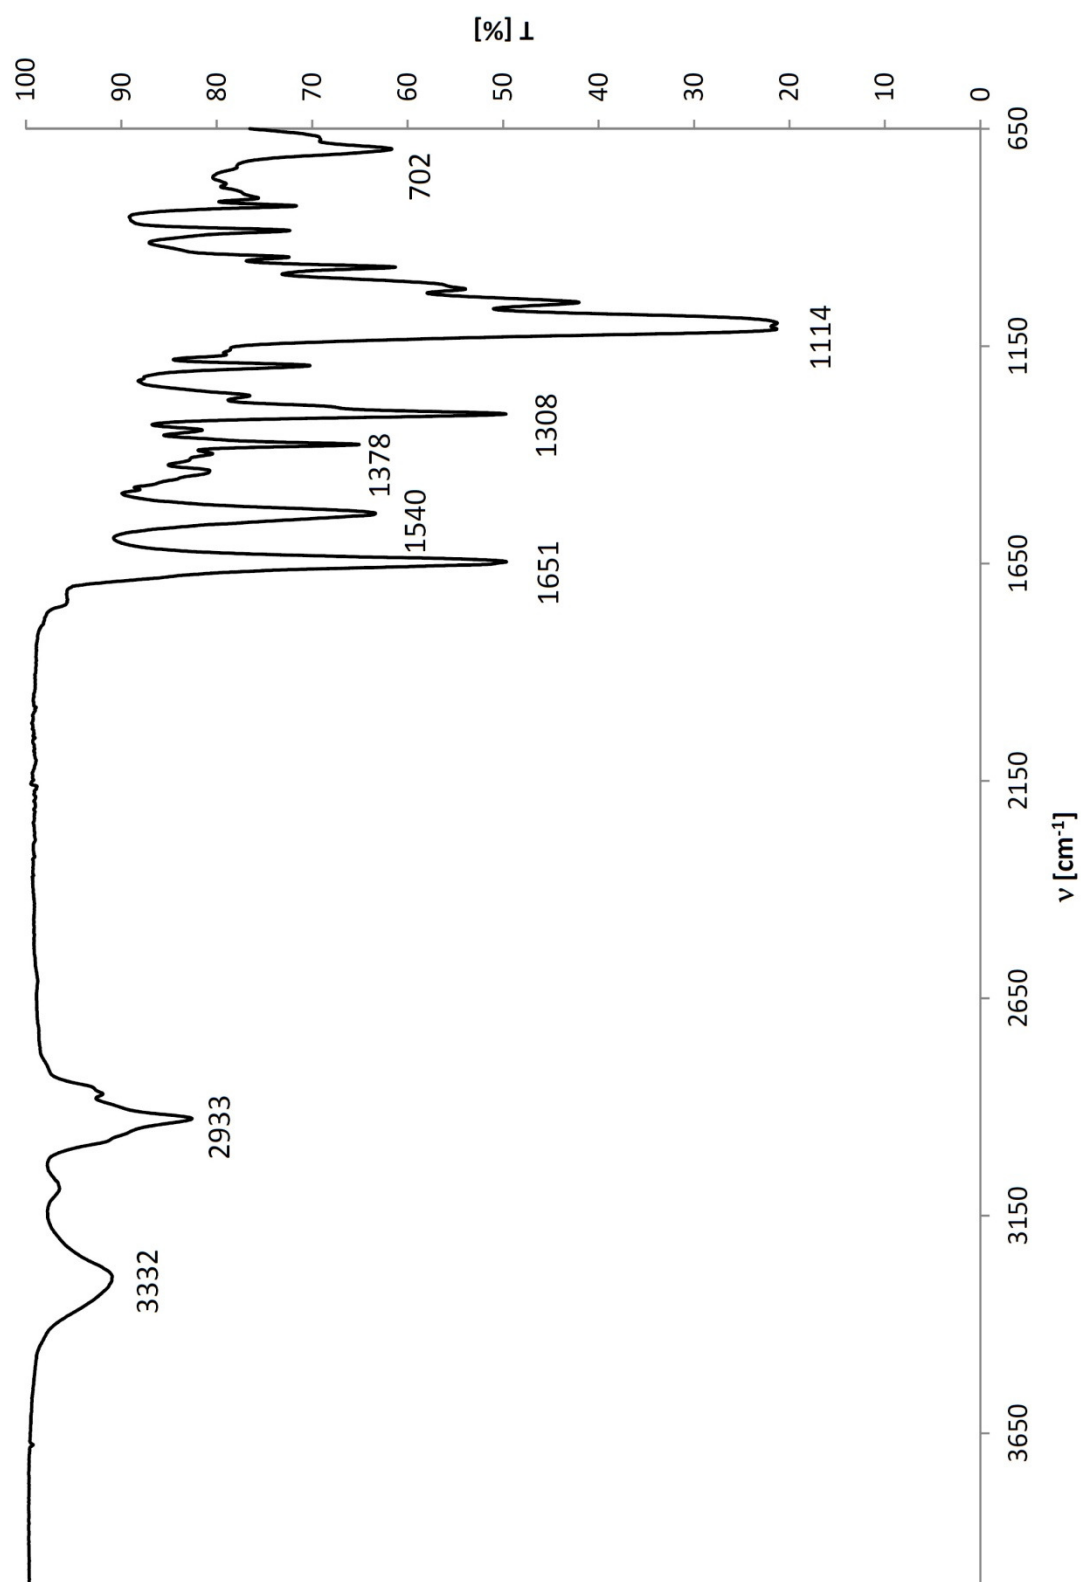

Fig. S3: ATR-IR spectrum of 2

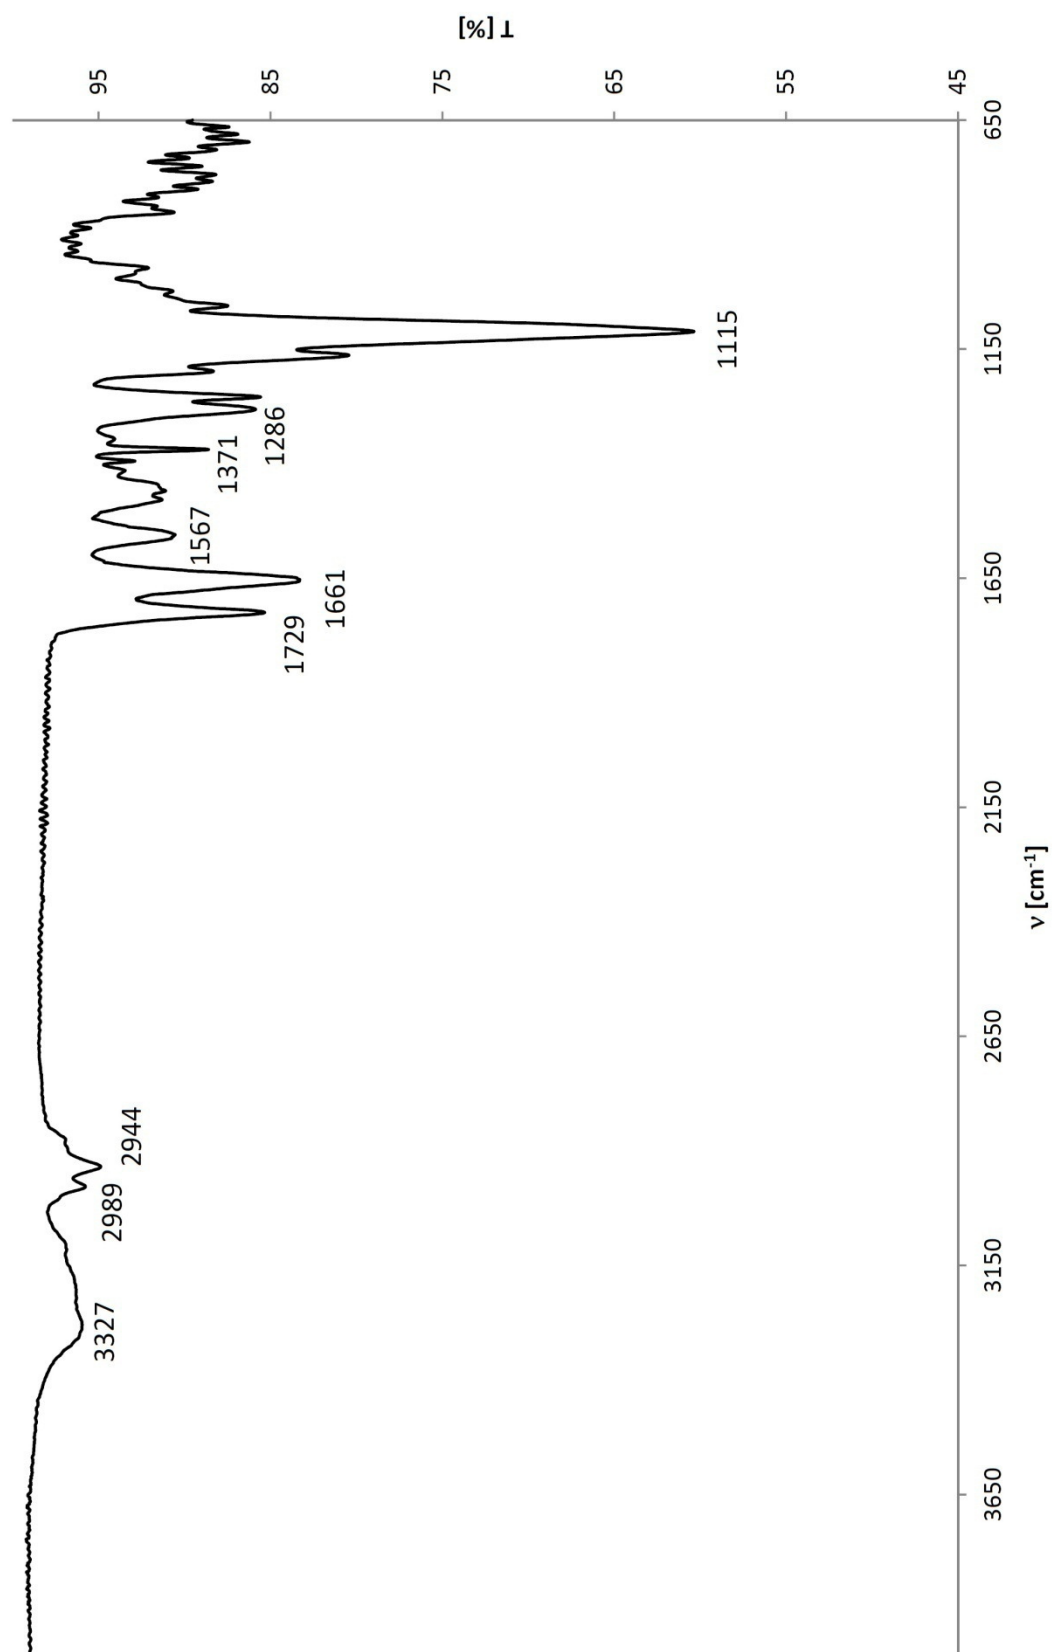

**Fig. S4:** ATR-IR spectrum of **3**.

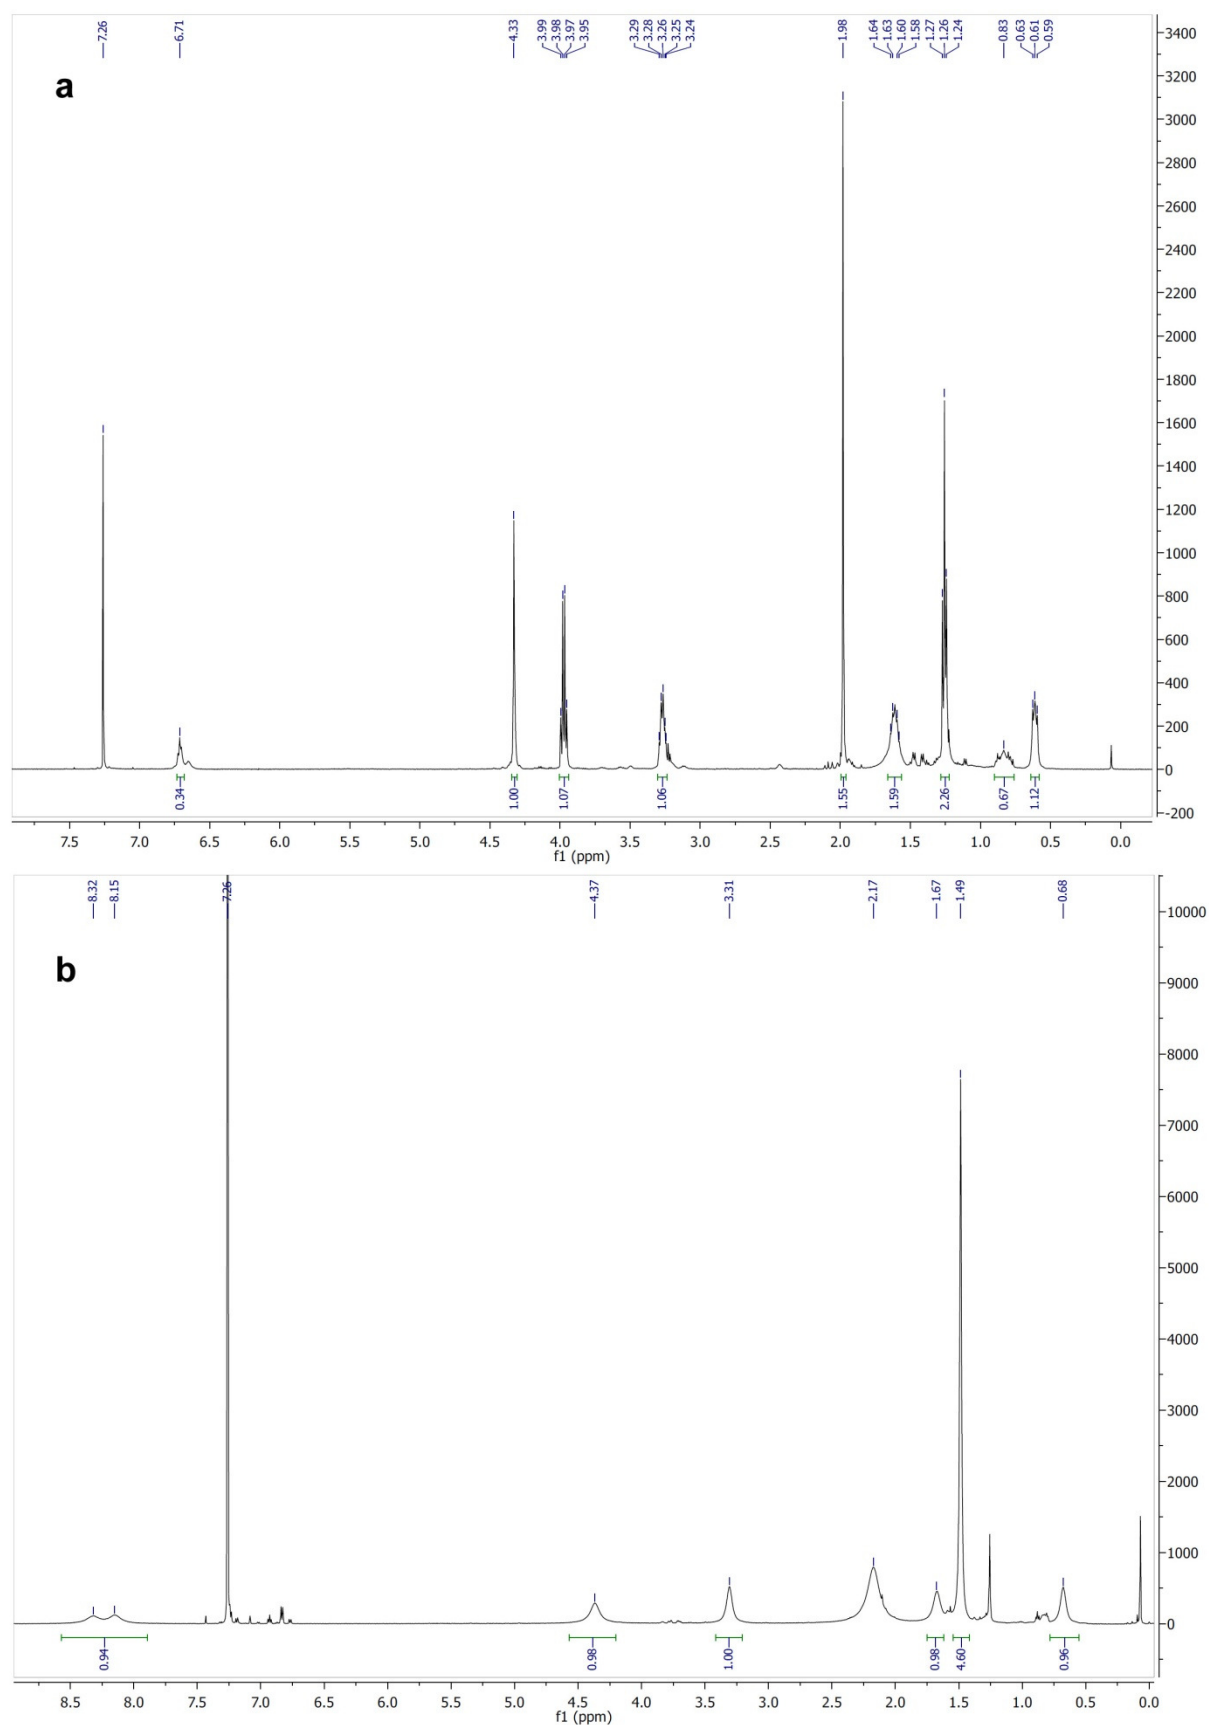

**Fig. S5:** (a) <sup>1</sup>H-NMR of **2**, (b) <sup>1</sup>H-NMR of **3**.

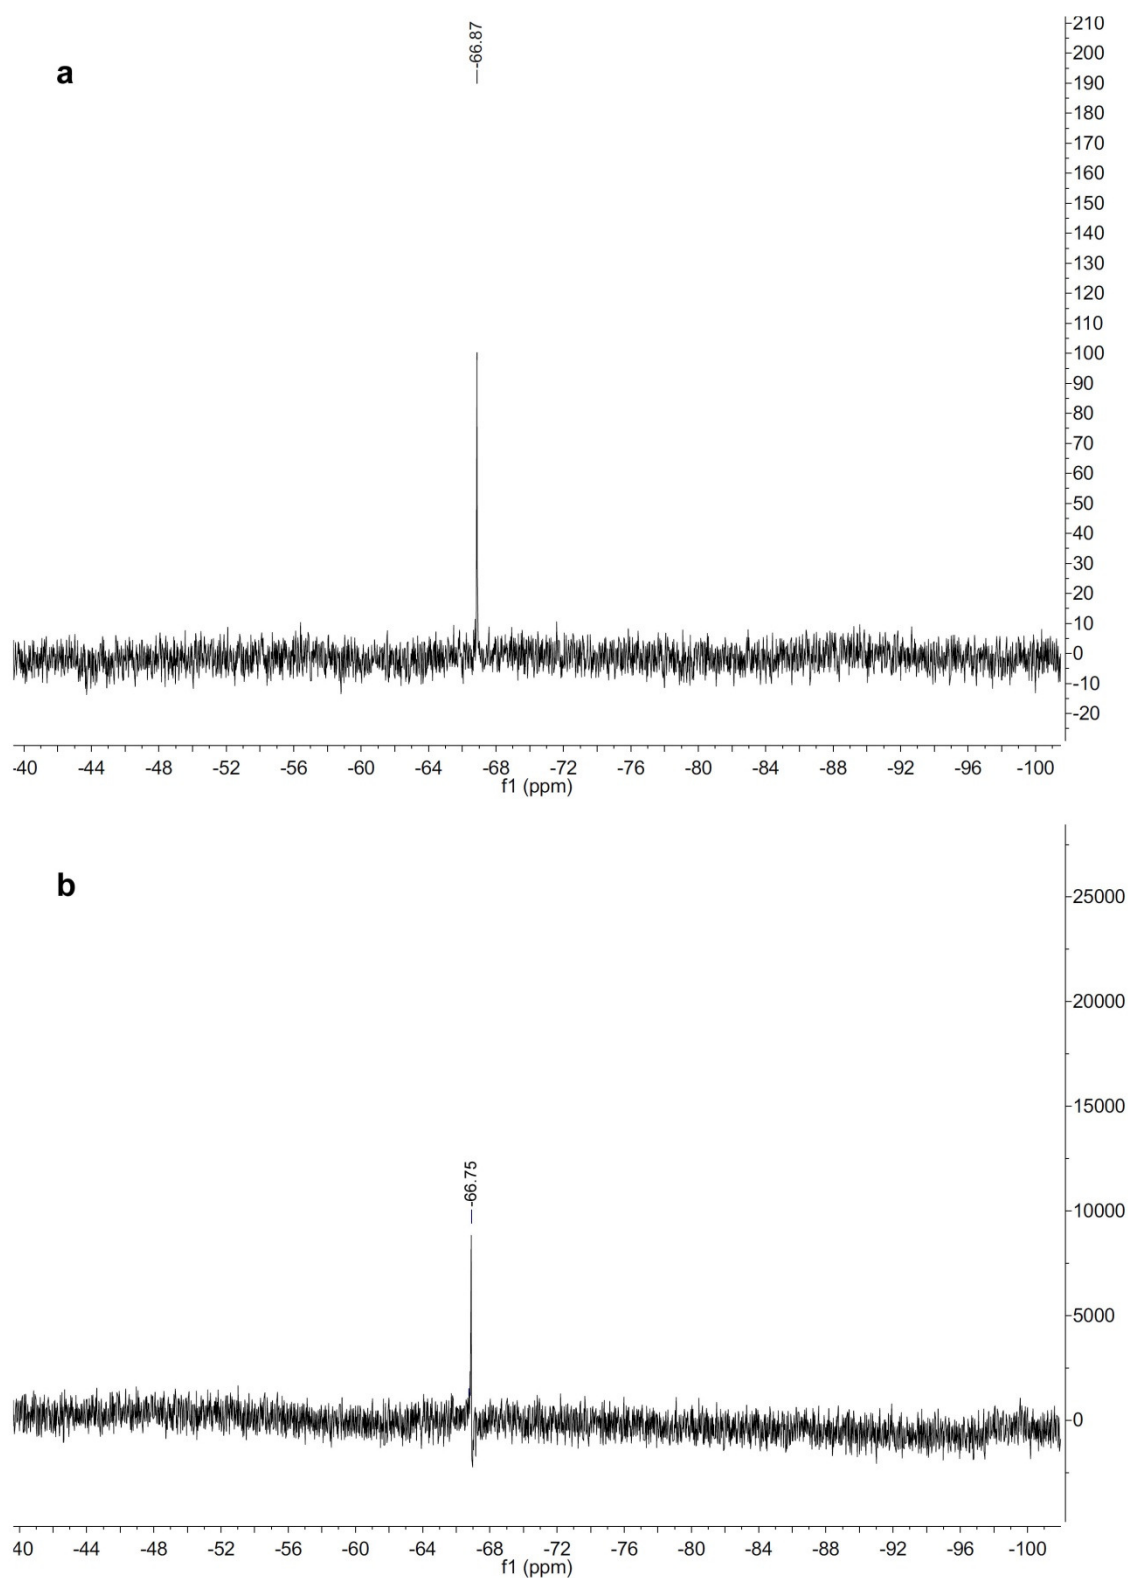

**Fig. S6:** (a)  $^{29}\text{Si}$ -NMR of **2**, (b)  $^{29}\text{Si}$ -NMR of **3**, the NMR spectra were base-line corrected using MestReNova.

5

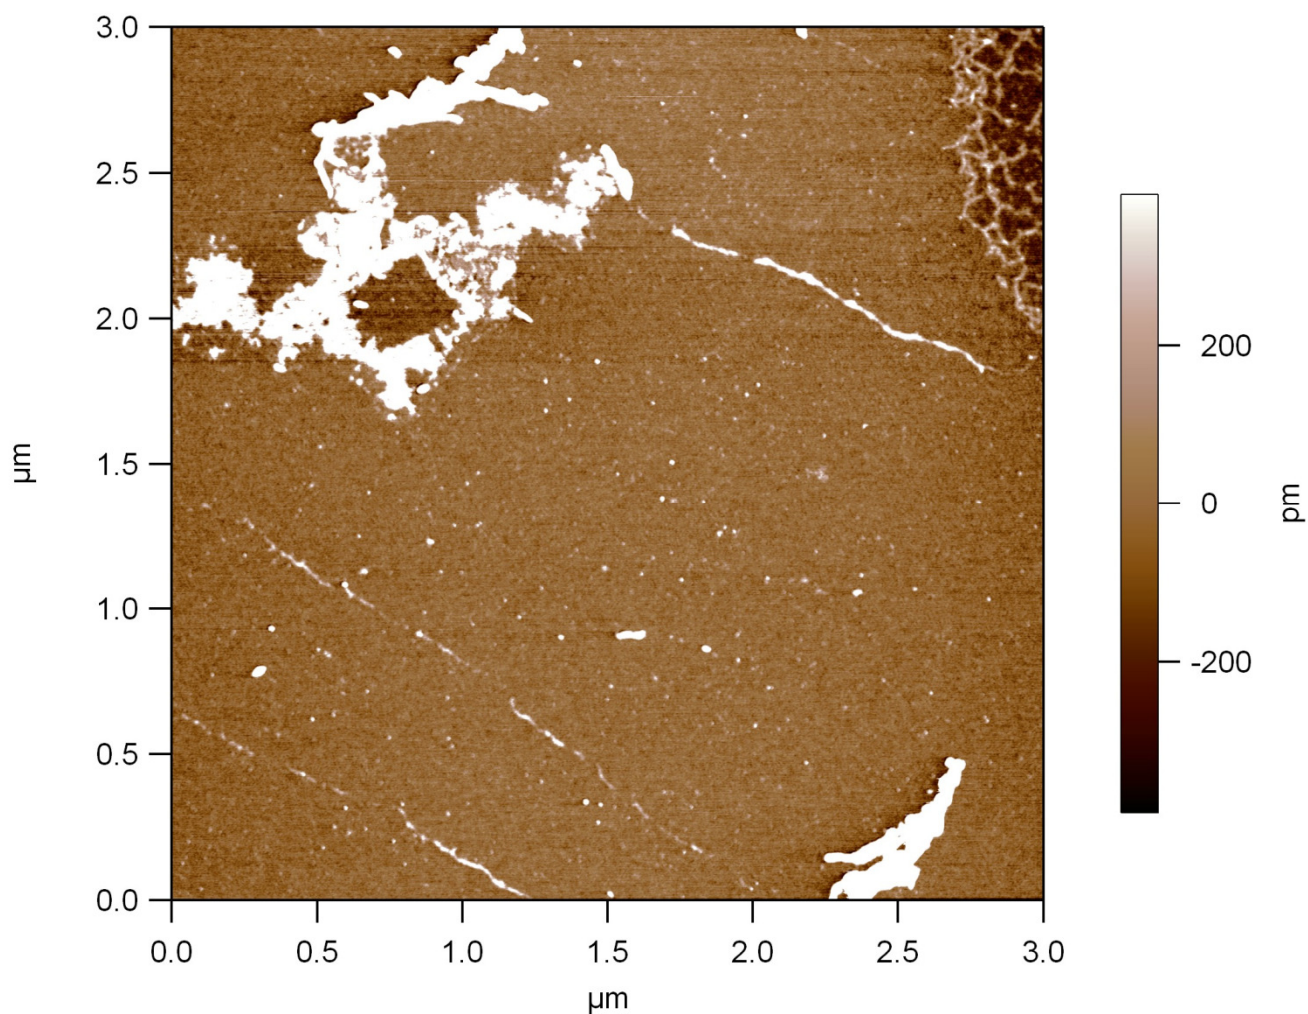

**Fig. S7:** AFM image of aggregated and randomly distributed COSS particles 1.

10

15

20



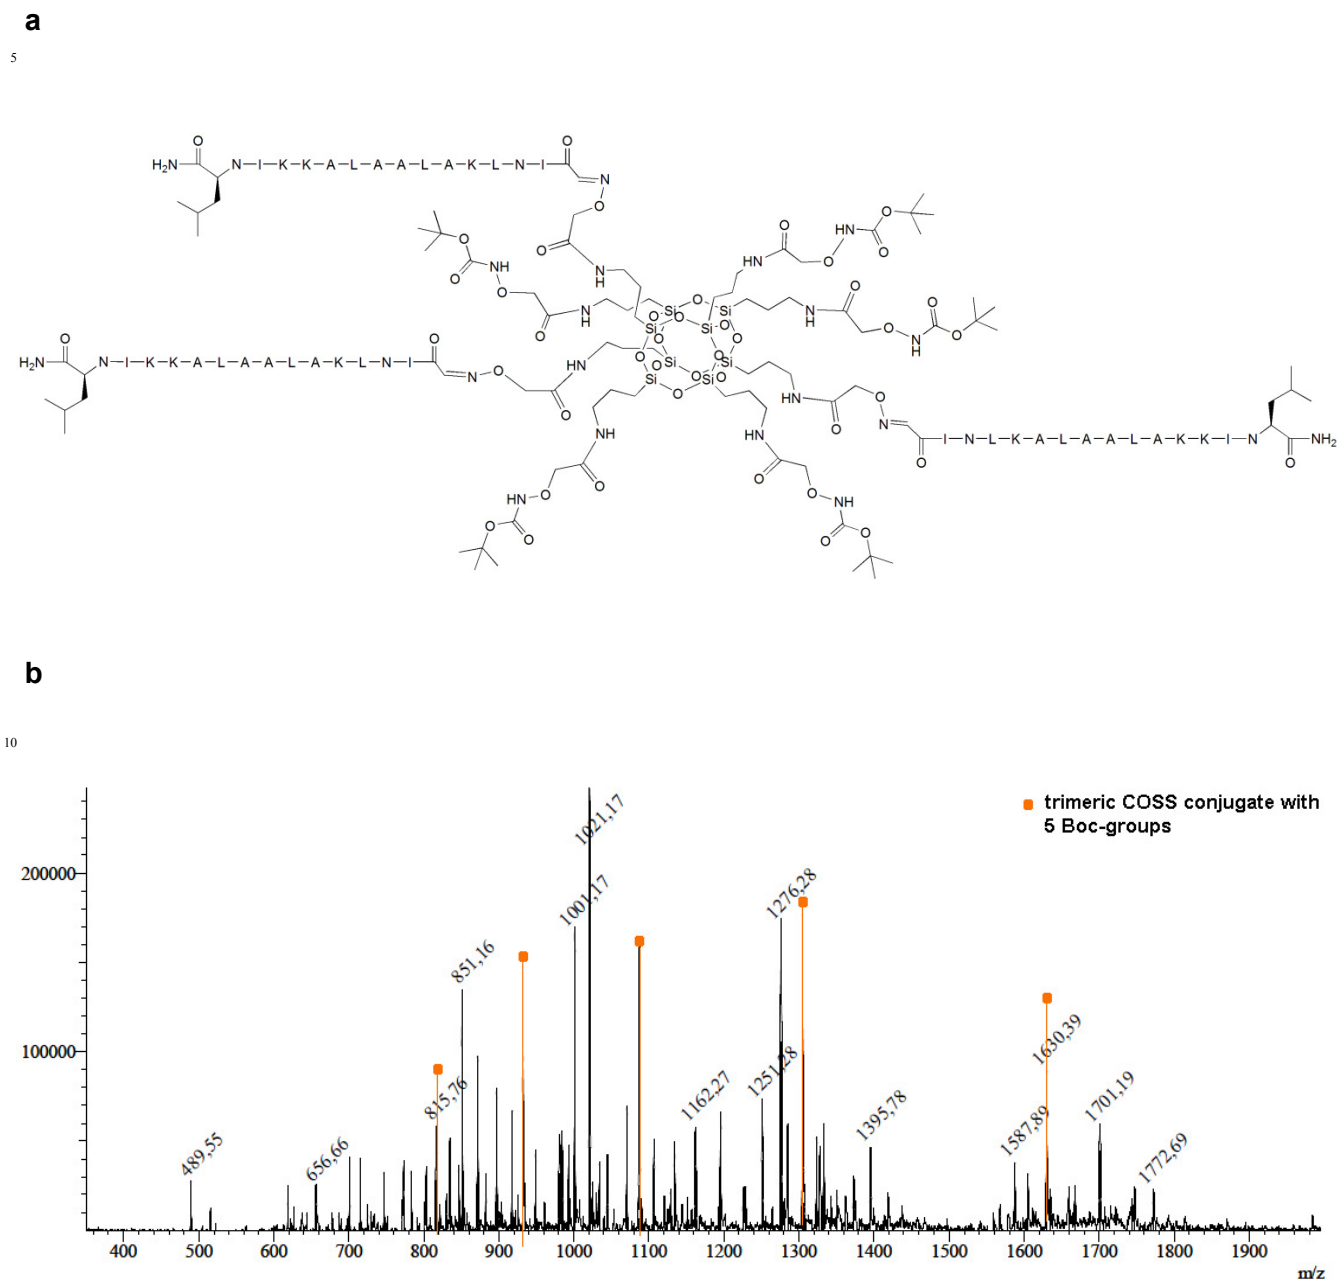

**Fig. S8:** (a) proposed structure of reaction intermediates in the synthesis of **6**. (b) ESI-MS spectrum of the reaction mixture after 30 min.

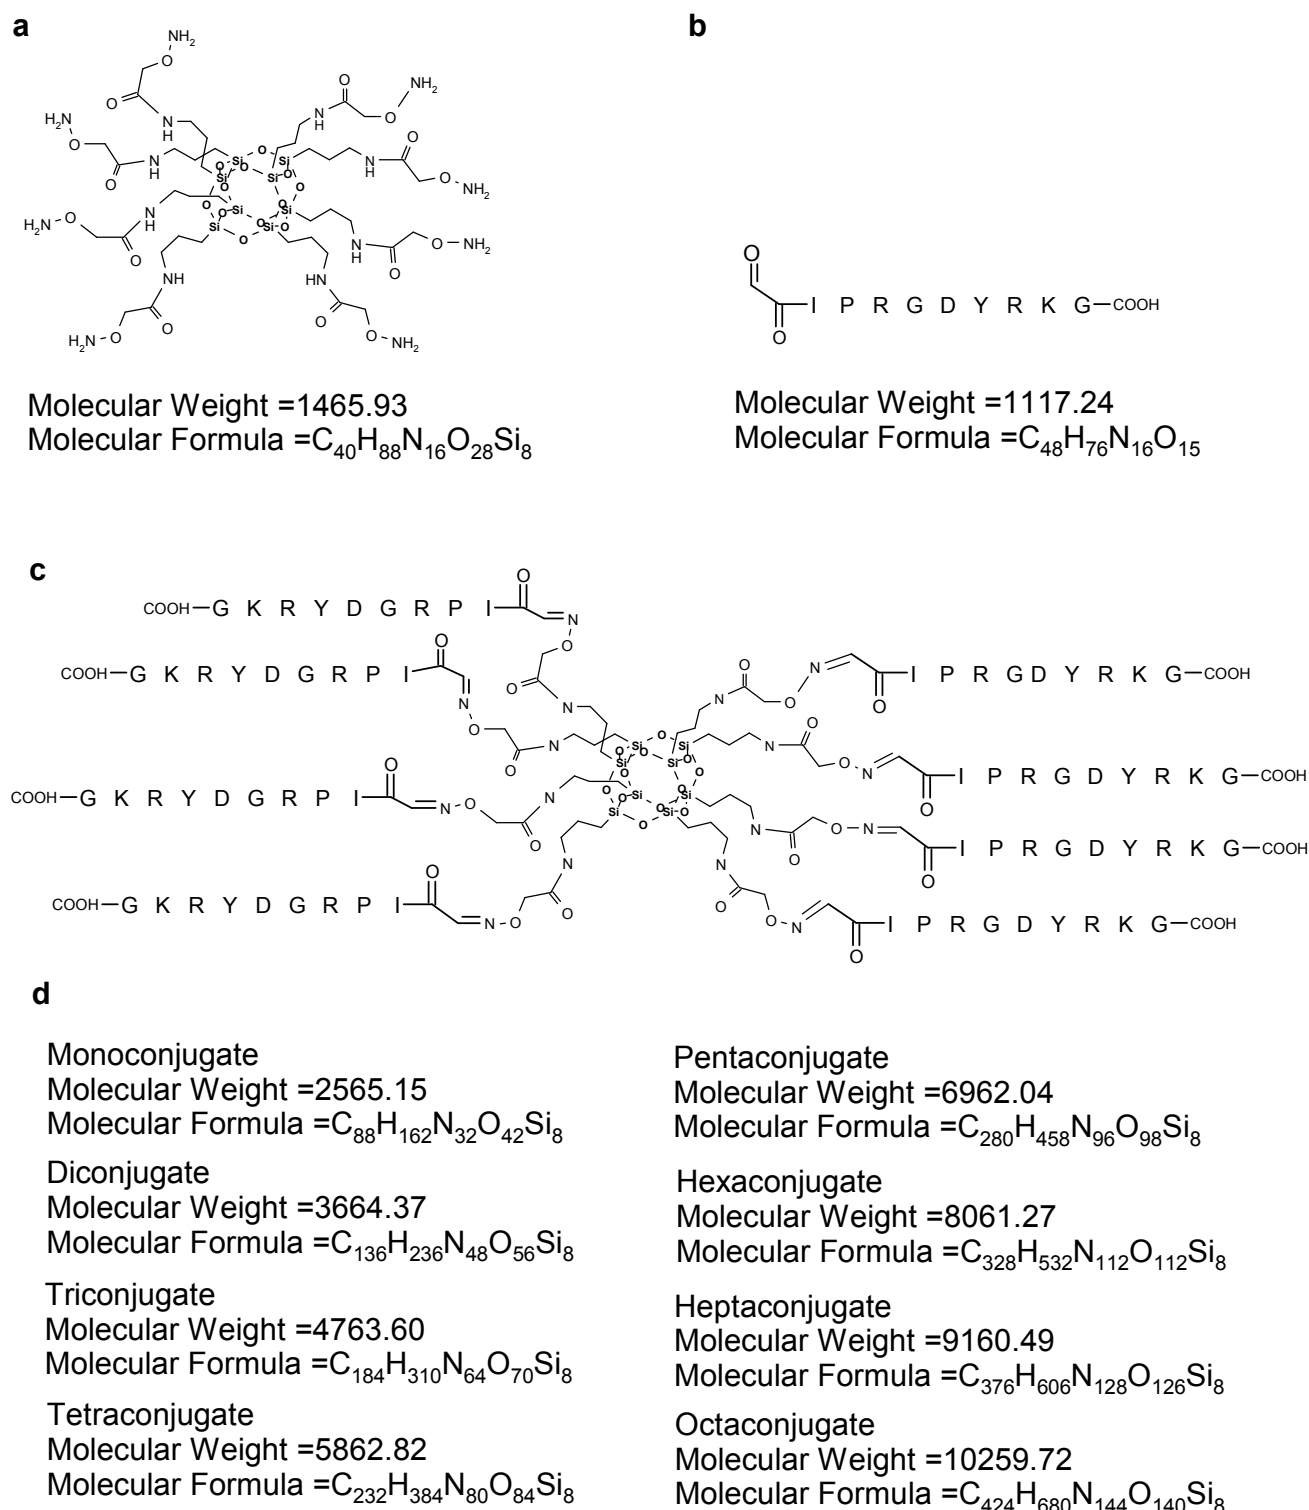

**Fig. S9:** (a) unprotected aminoxy COSS particle, (b) periodate oxidized **p4**, (c) possible conjugation products **4**.

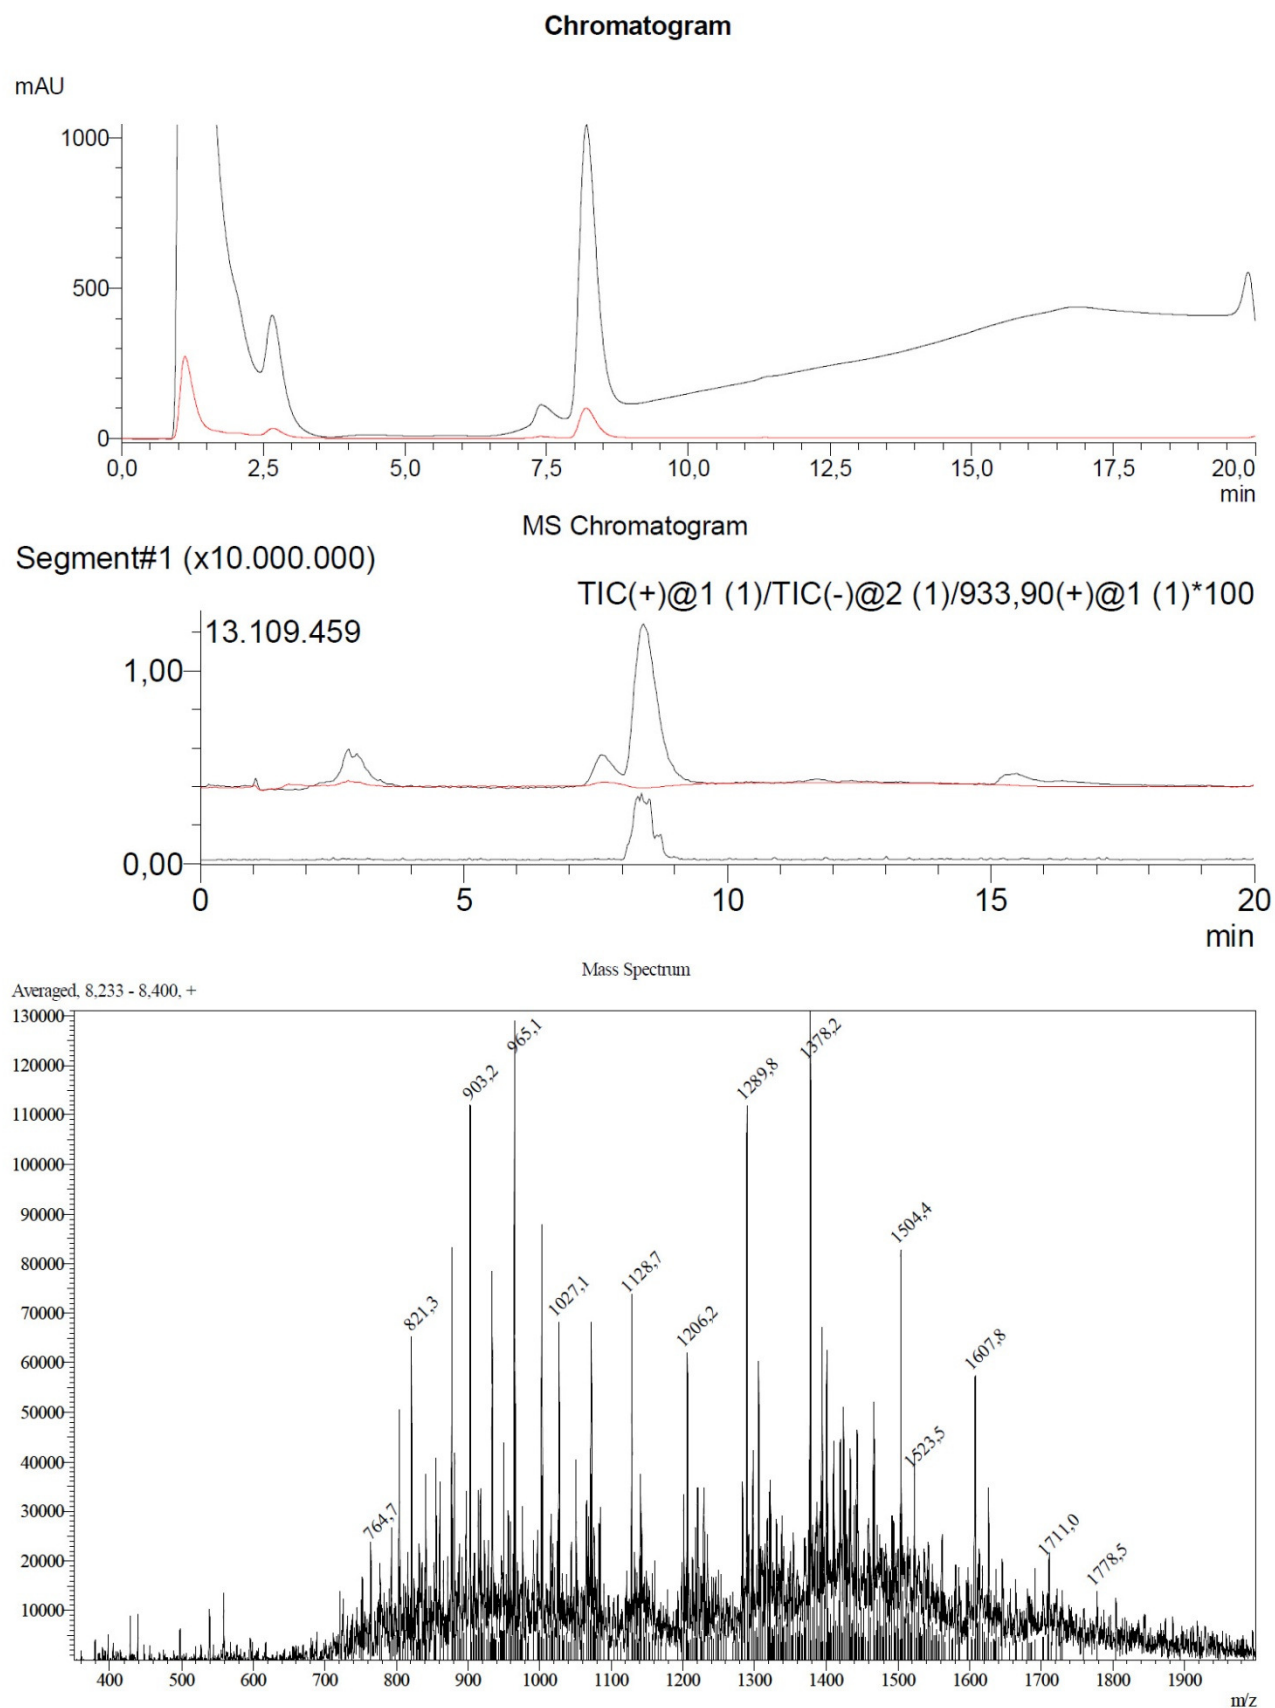

**Fig. S10:** LC-MS monitoring of the synthesis of **4**: analysis after overnight reaction.

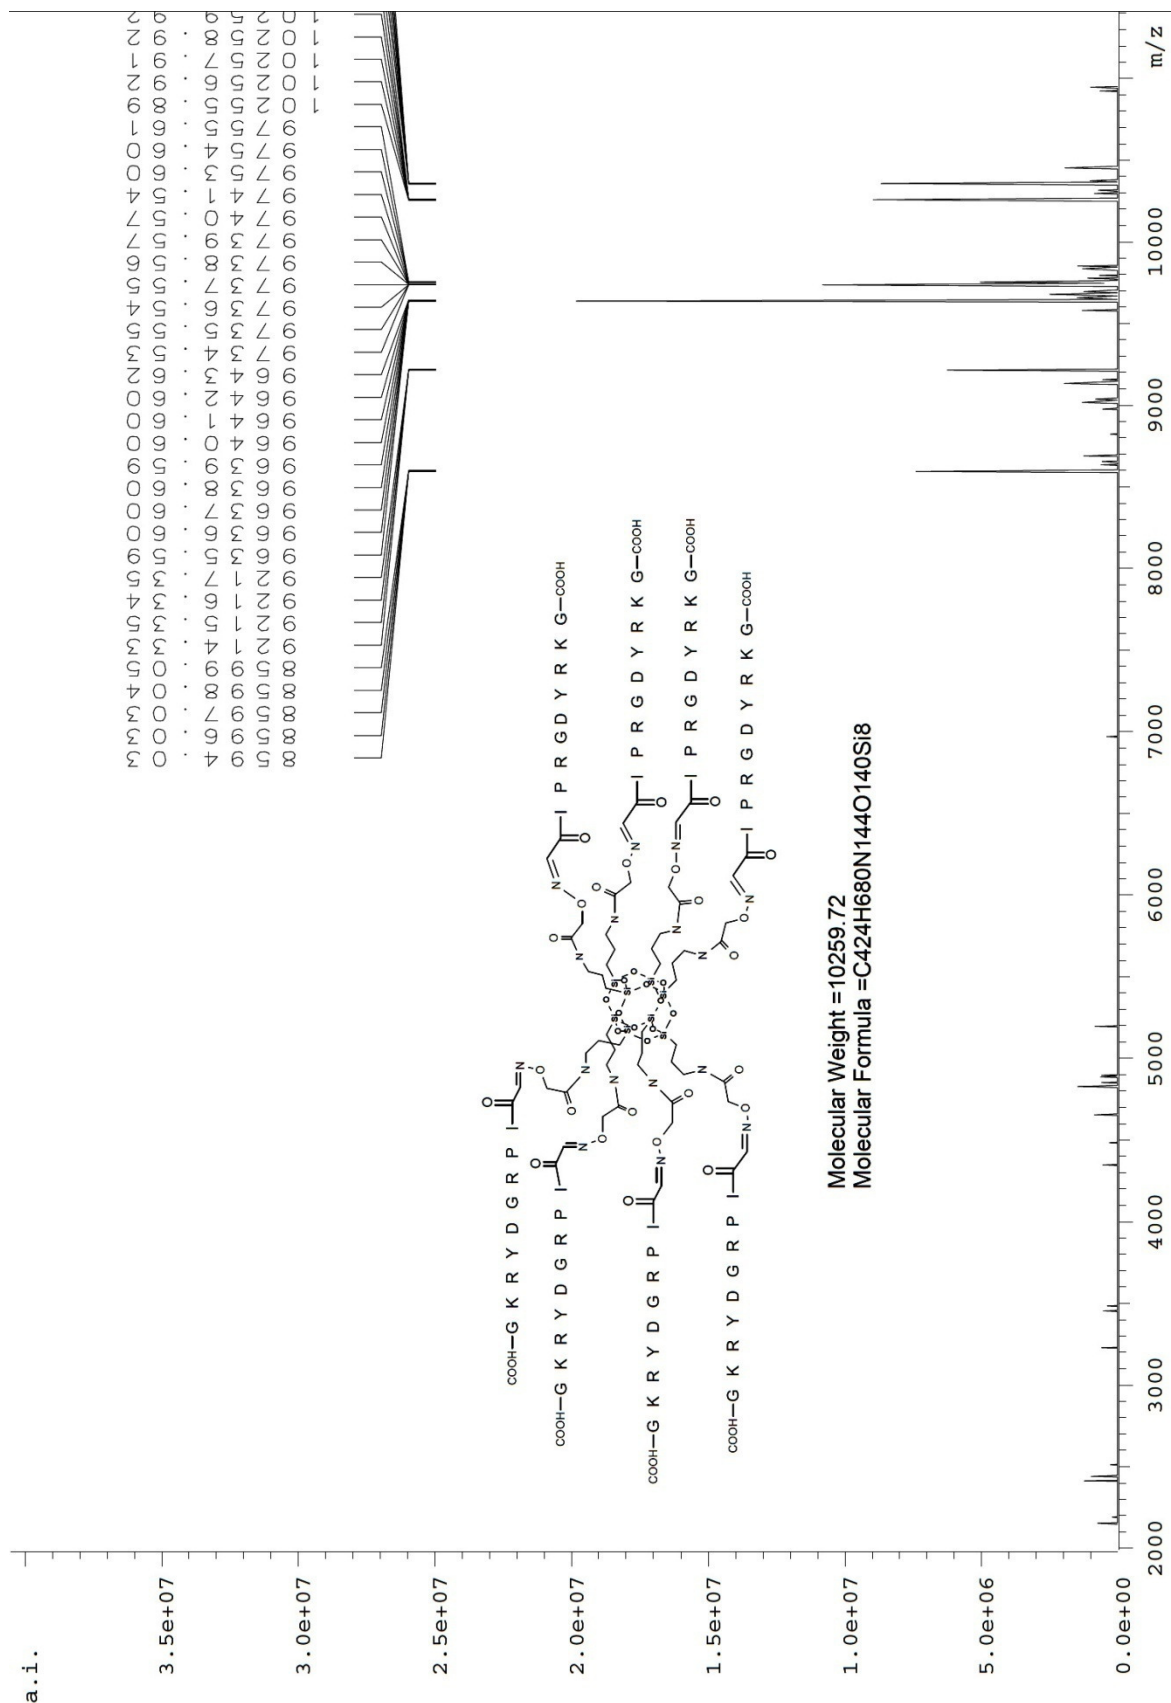

Fig. S11: Synthesis of 4: deconvoluted ESI MS spectrum of the reaction mixture.

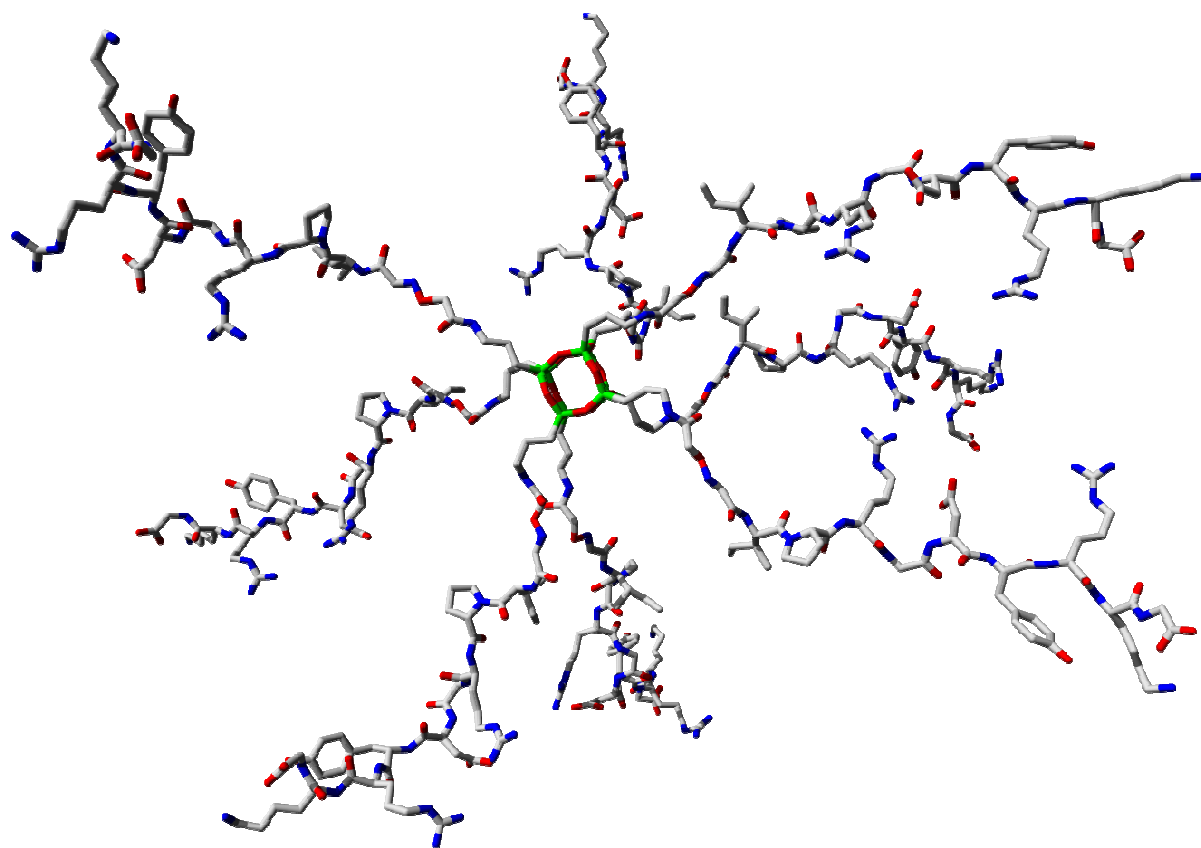

**Fig. S12:** 3D representation (sticks) of compound **4**. The model was generated using the YASARA structure package. After modelling of the COSS core atoms and connectivities an energy minimization procedure was applied. The respective peptide structures (compare **p4**) were attached, and the core coordinates were fixed. The resulting conjugate **4** was simulated in 0.9 % (m/v) NaCl aq. at pH 7 and 298 K for 0.1 ns using the AMBER03 force field. Blue: nitrogen, green: silicon, red: oxygen, grey: carbon, hydrogen was left out for clarity. Representative diameters were measured as distances of C-terminal carboxylic carbons of peptide ligands attached to opposing corners of the COSS cage. The measured values were: 7.21 nm, 6.69 nm, 6.16 nm, and 5.61 nm. The resulting average diameter was  $6.42 \pm 0.69$  nm.

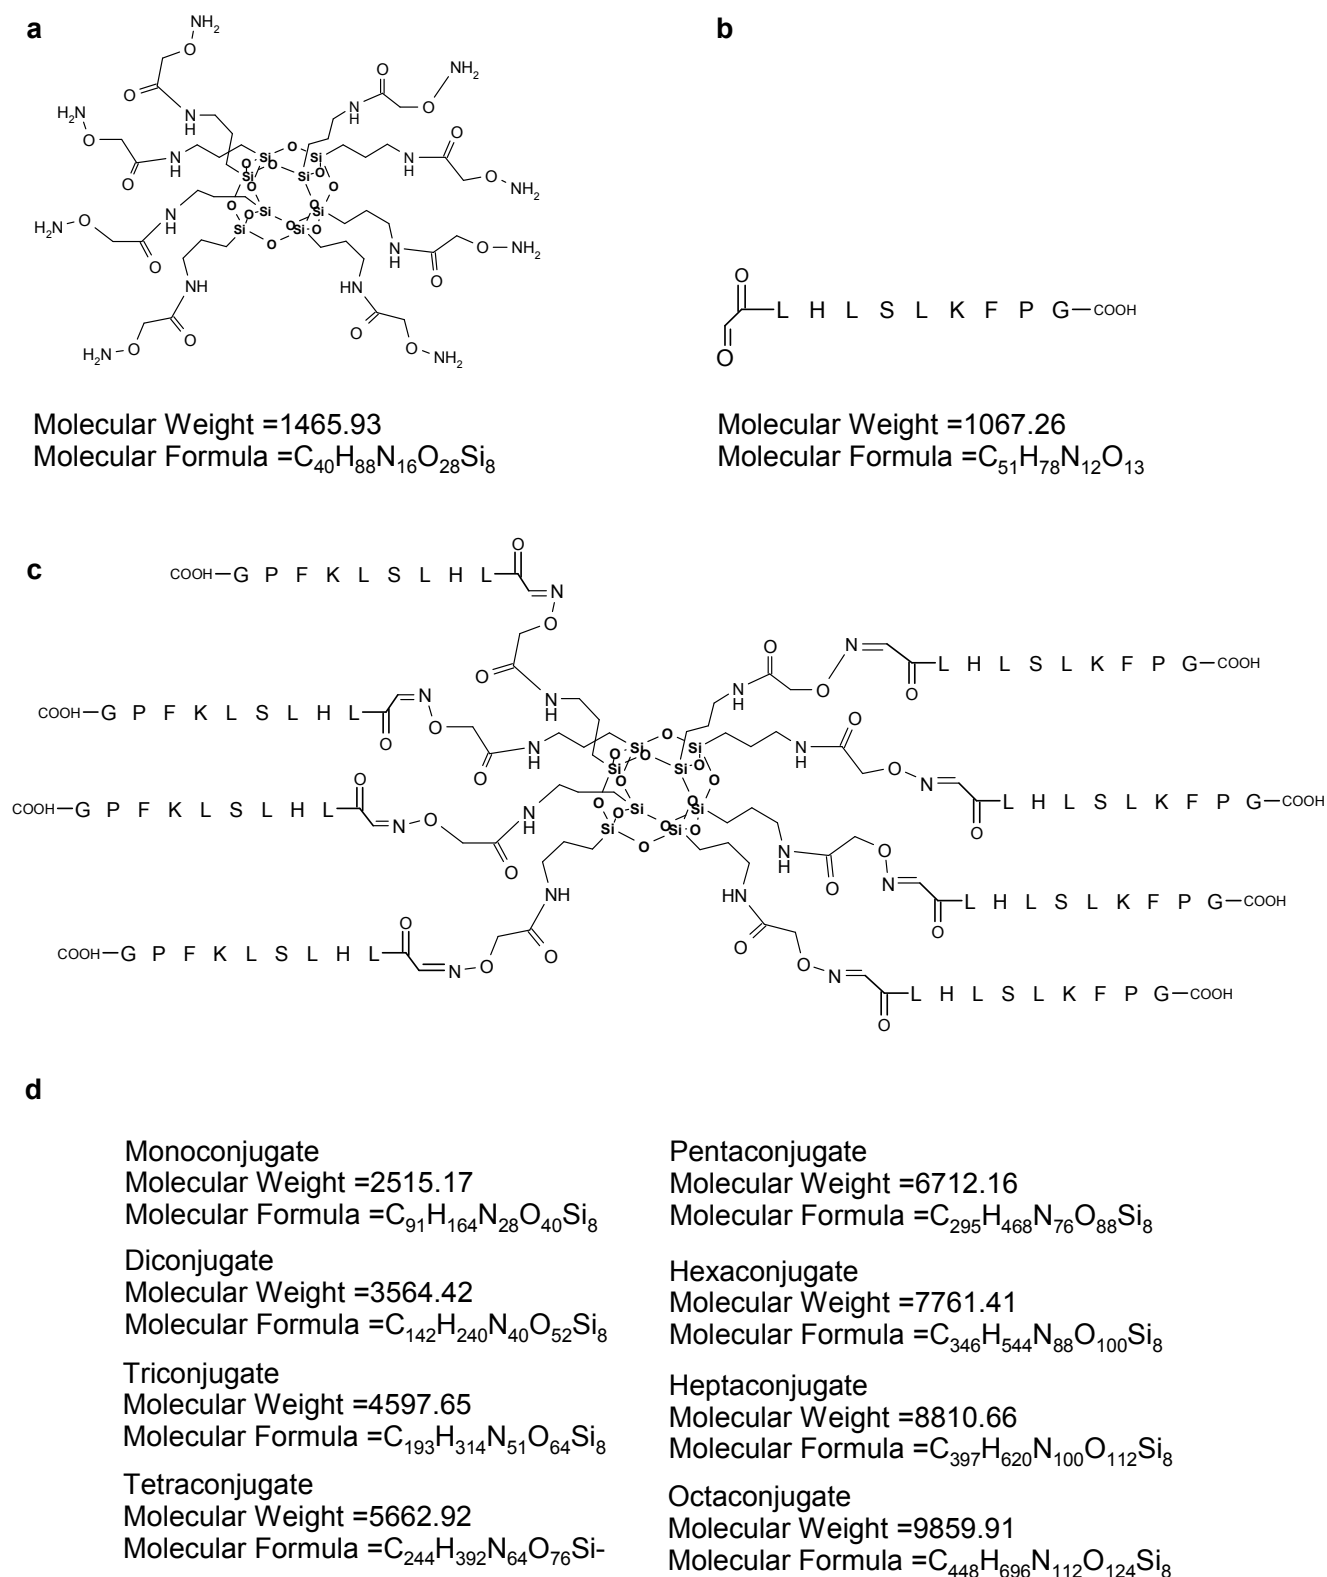

**Fig. S13:** (a) unprotected aminoxy COSS particle, (b) periodate oxidized **p5**, (c) possible conjugation products **5**.

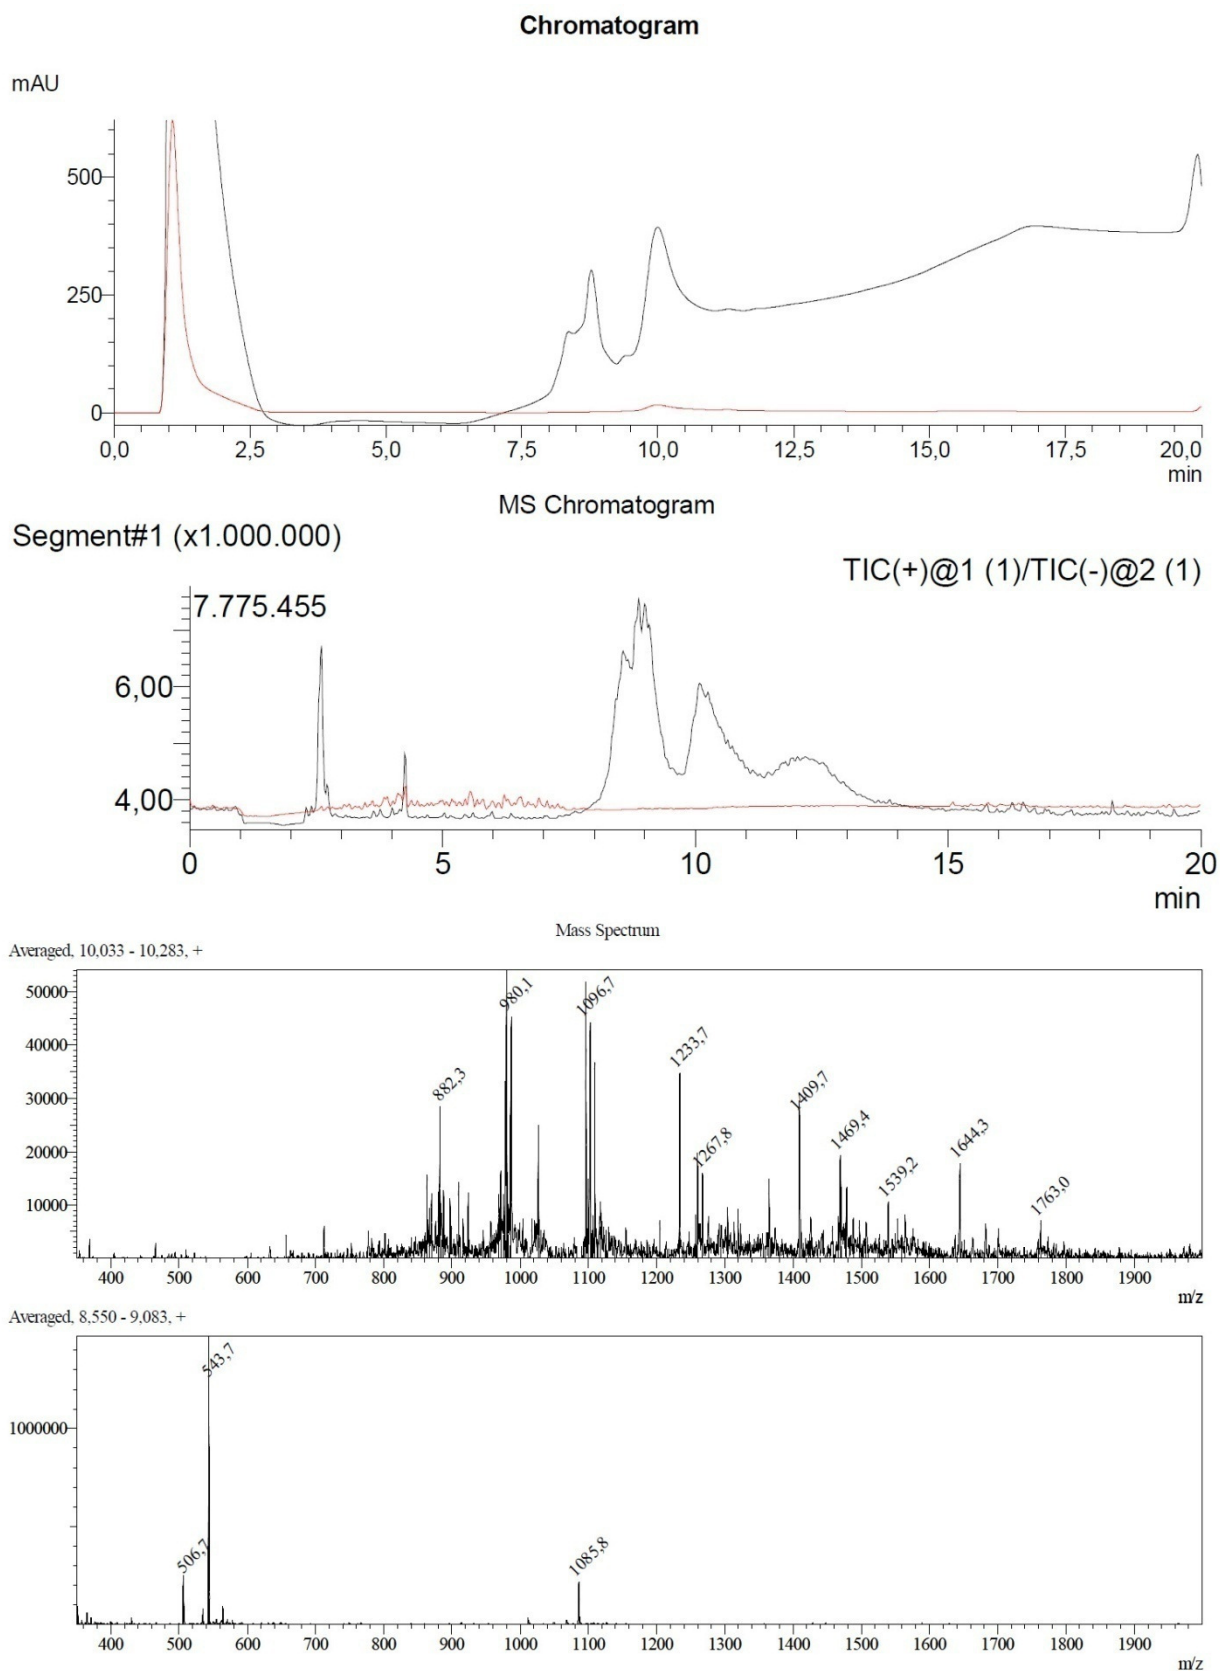

**Fig. S14:** LC-MS monitoring of the synthesis of **5**: analysis after overnight reaction.



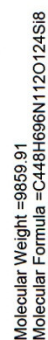

Journal Name, [year], [vol], 00–00 | 15



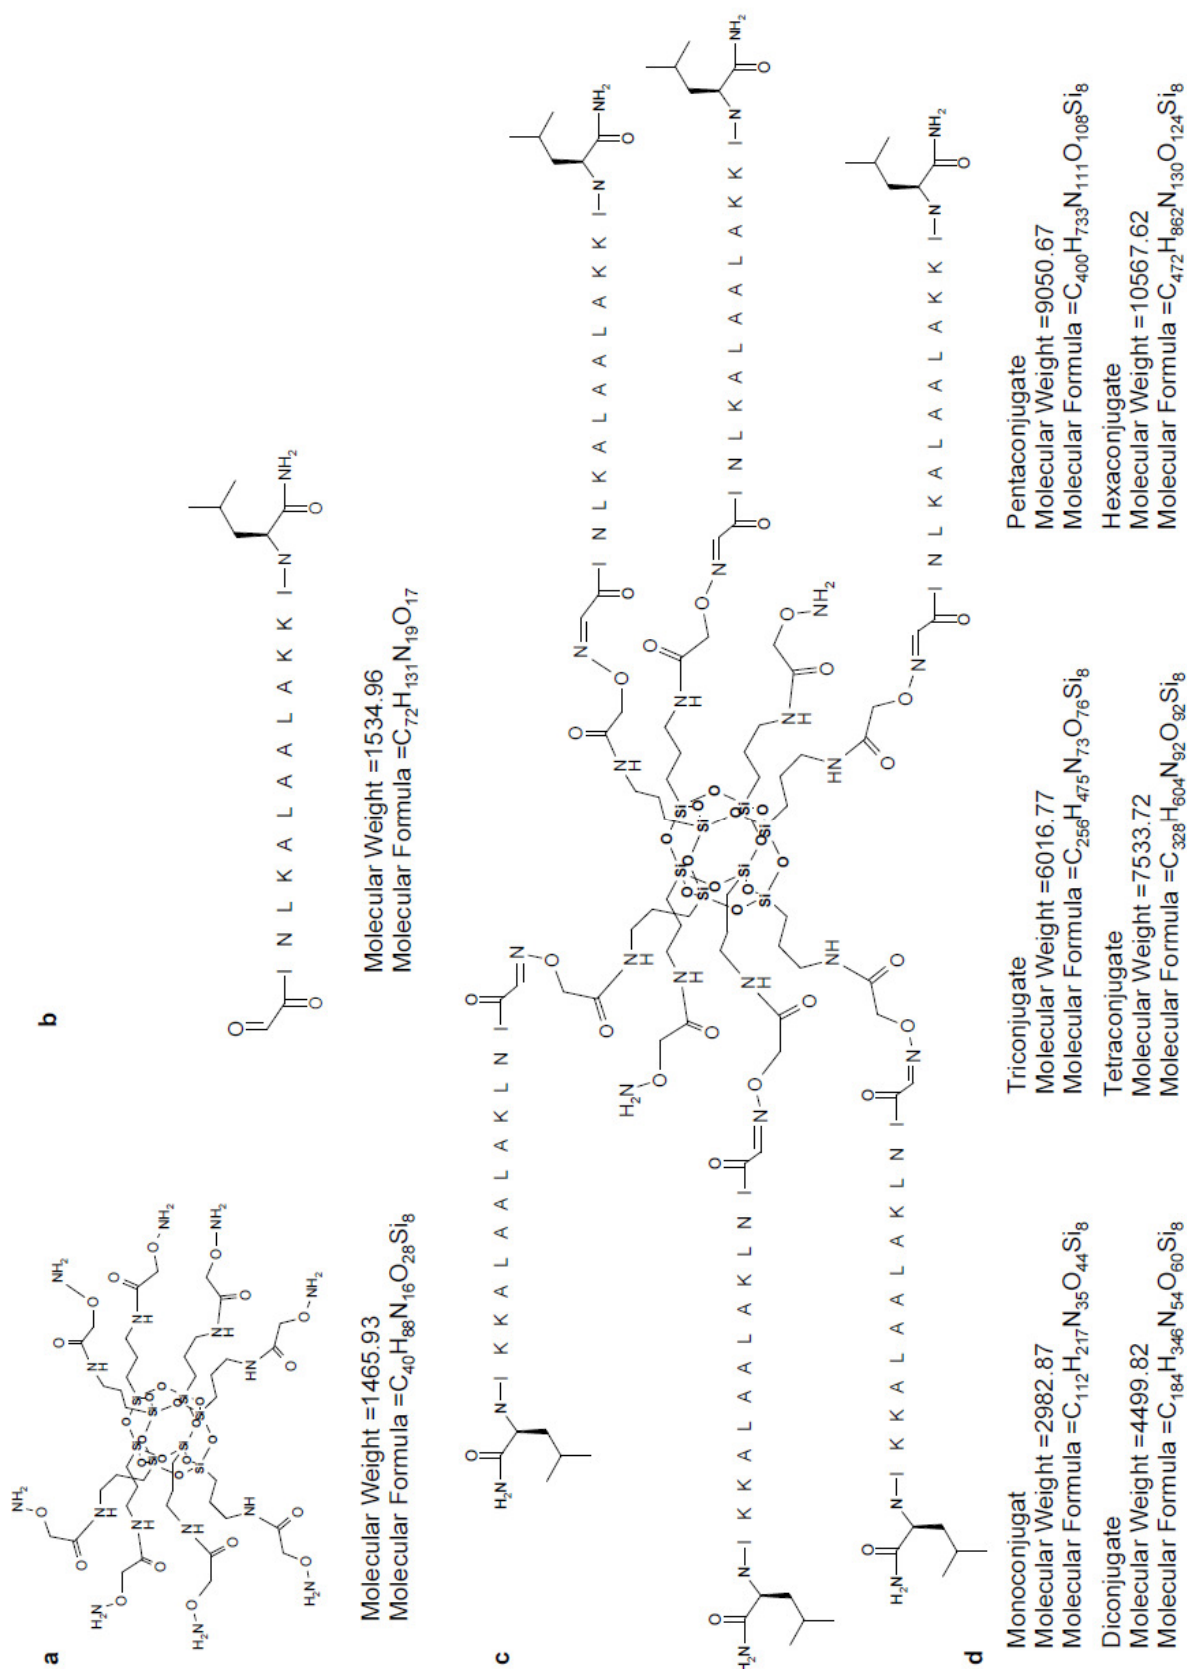

**Fig. S16:** (a) unprotected aminoxy COSS particle, (b) periodate oxidized **p6**, (c) possible conjugation products **6**.

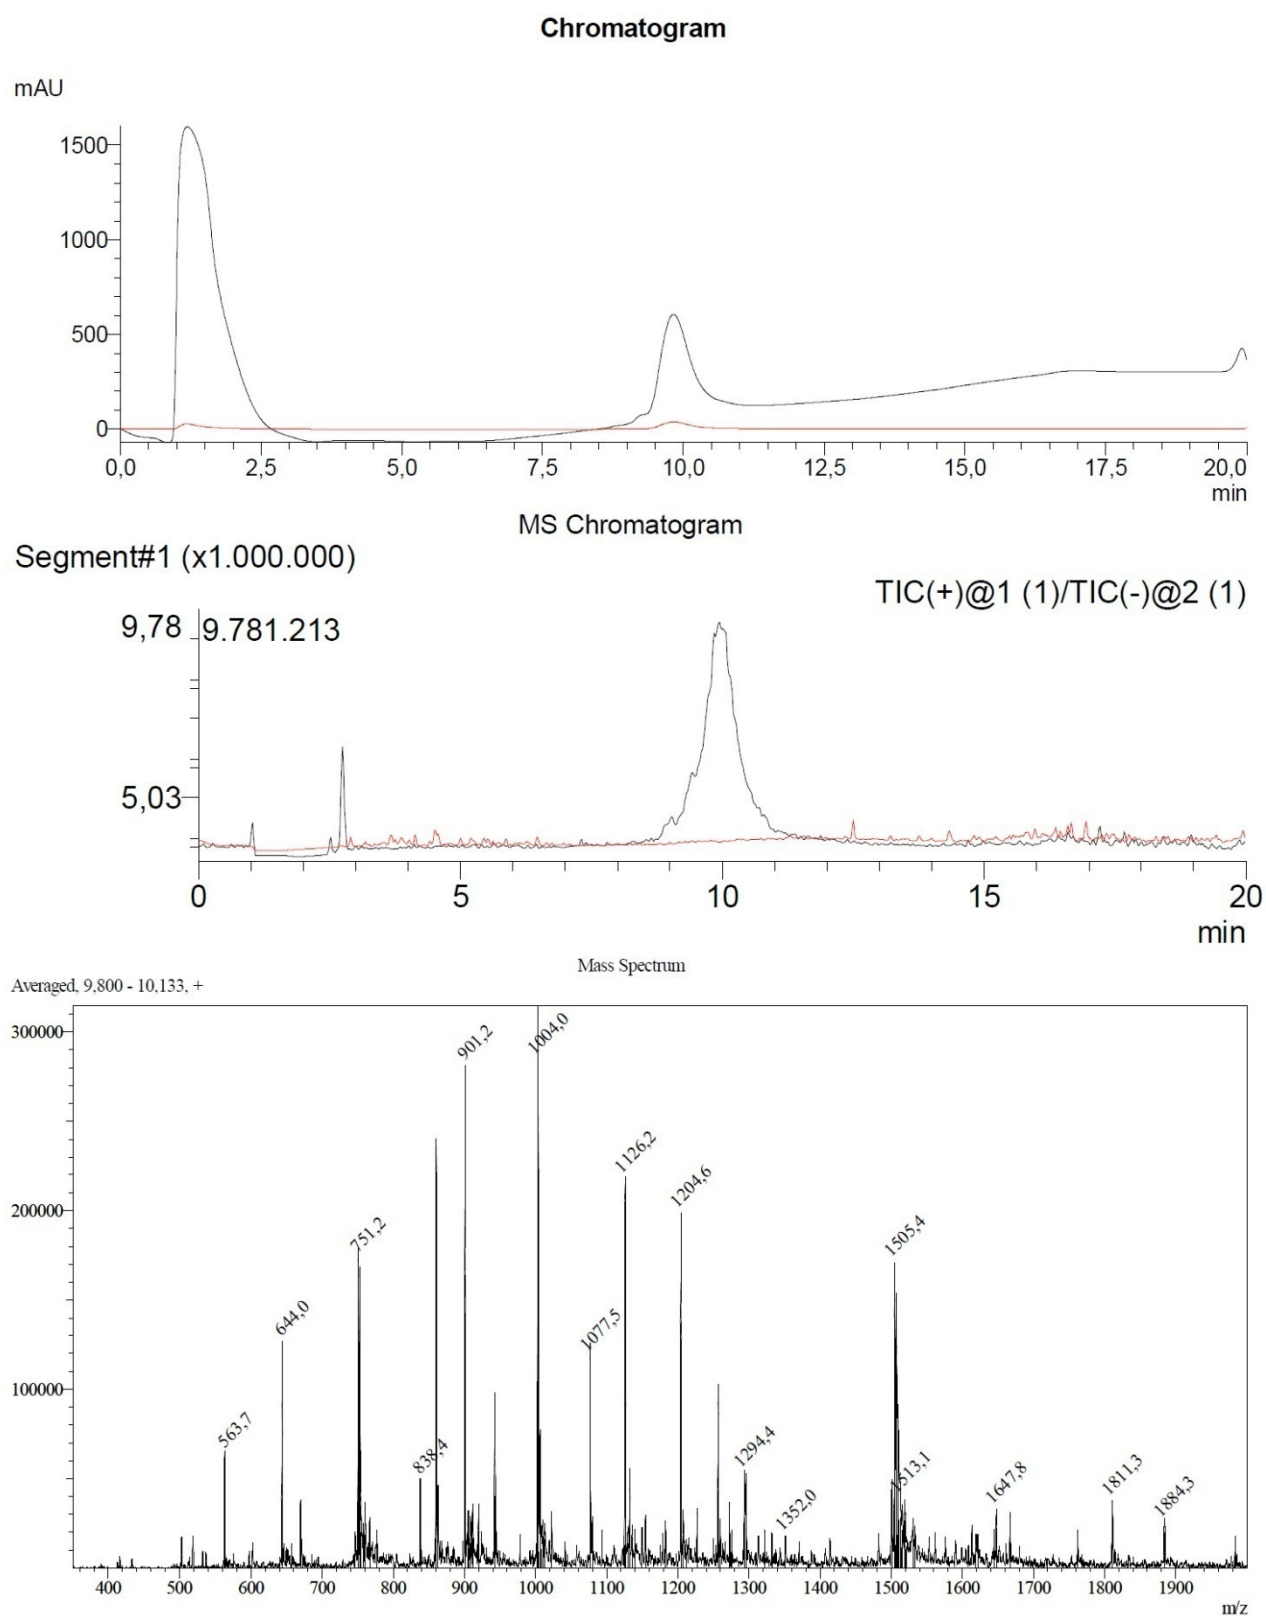

**Fig. S17:** LC-MS monitoring of the synthesis of **6**: analysis after overnight reaction.

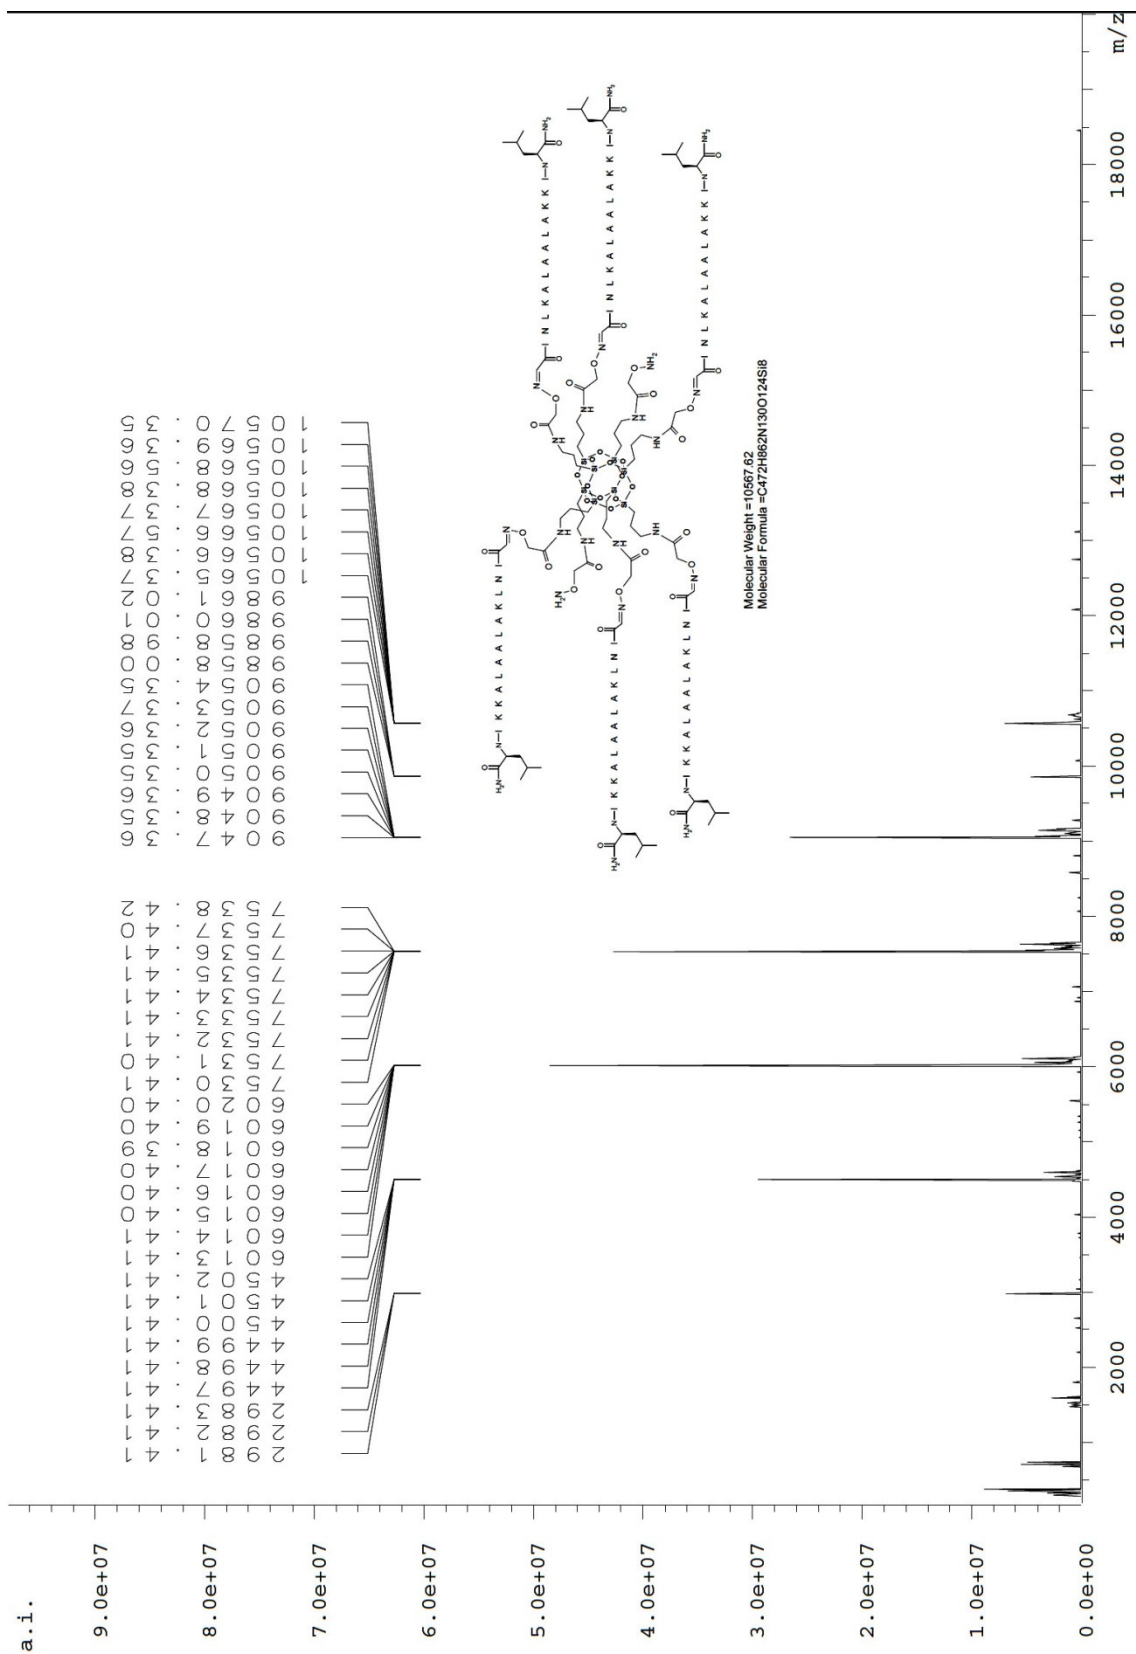

Fig. S18: Synthesis of 6: deconvoluted ESI MS spectrum of the reaction mixture.

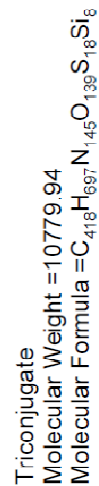

This journal is © The Royal Society of Chemistry [year]

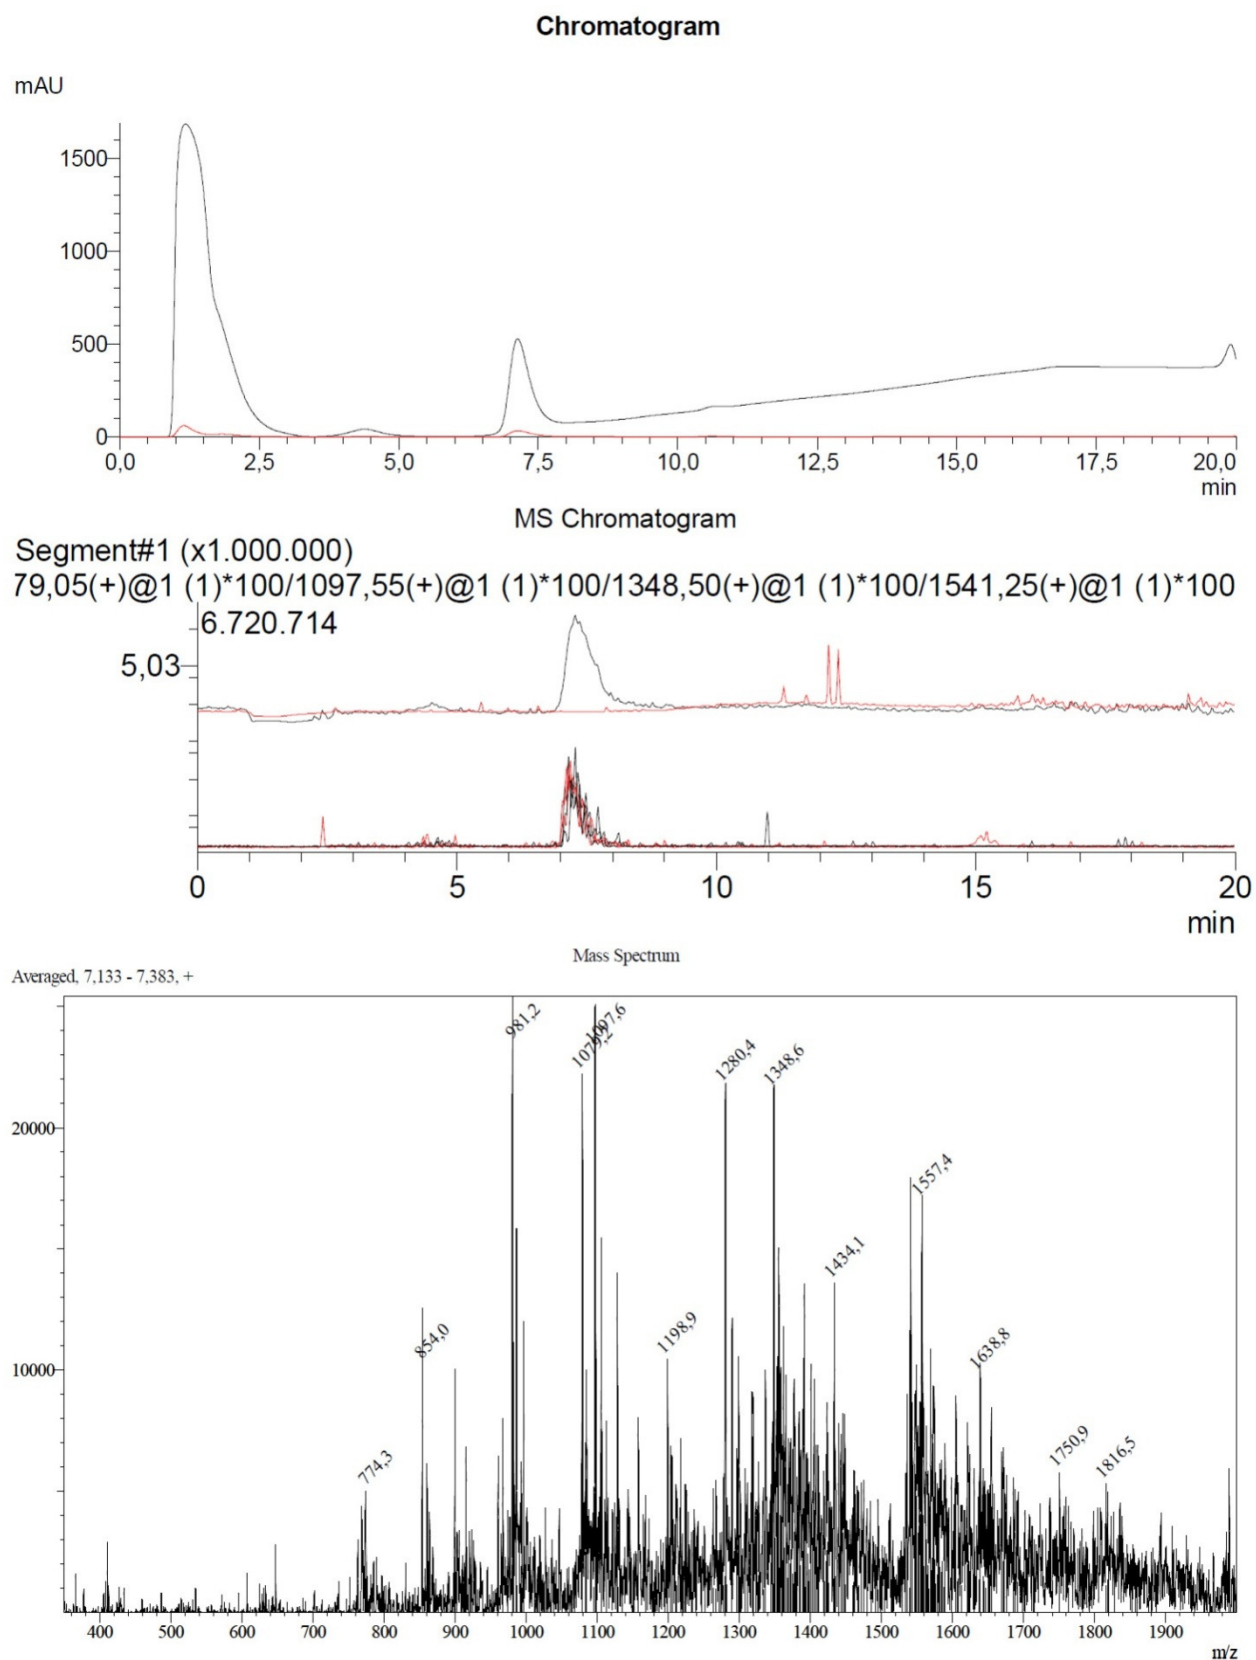

**Fig. S20:** LC-MS monitoring of the synthesis of **7**: analysis after overnight reaction.

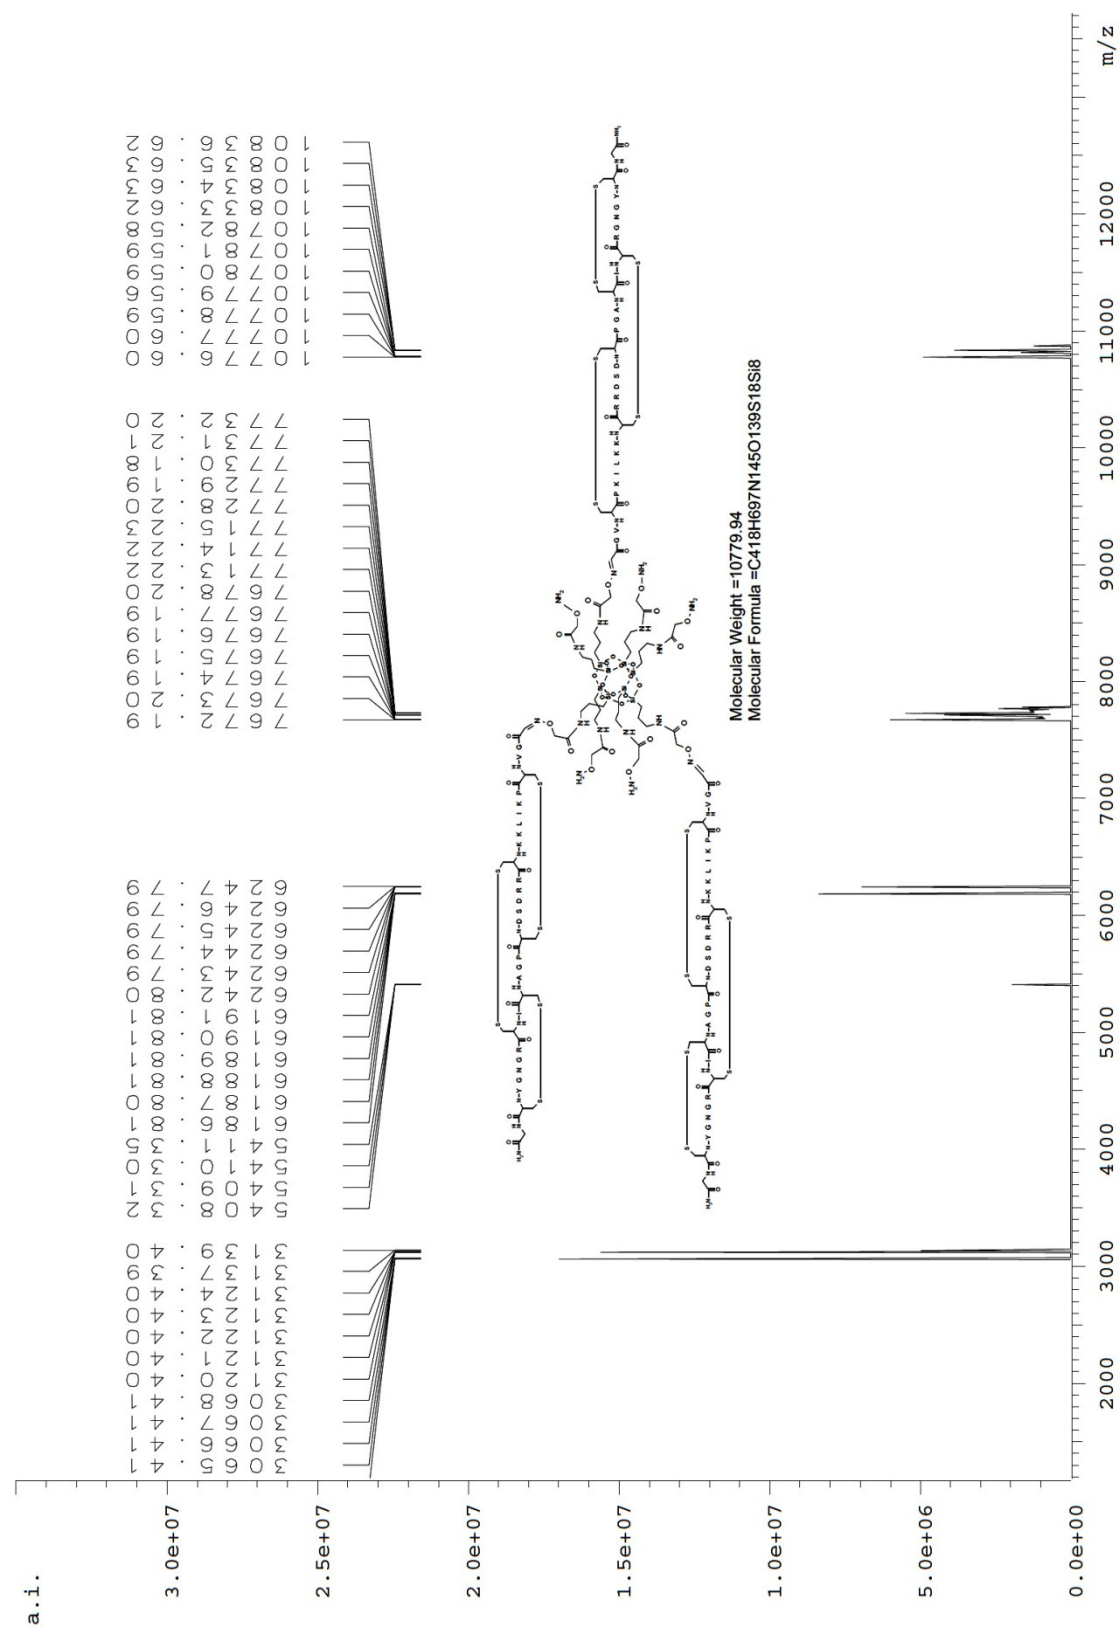

Fig. S21: Synthesis of 7: deconvoluted ESI MS spectrum of the reaction mixture.

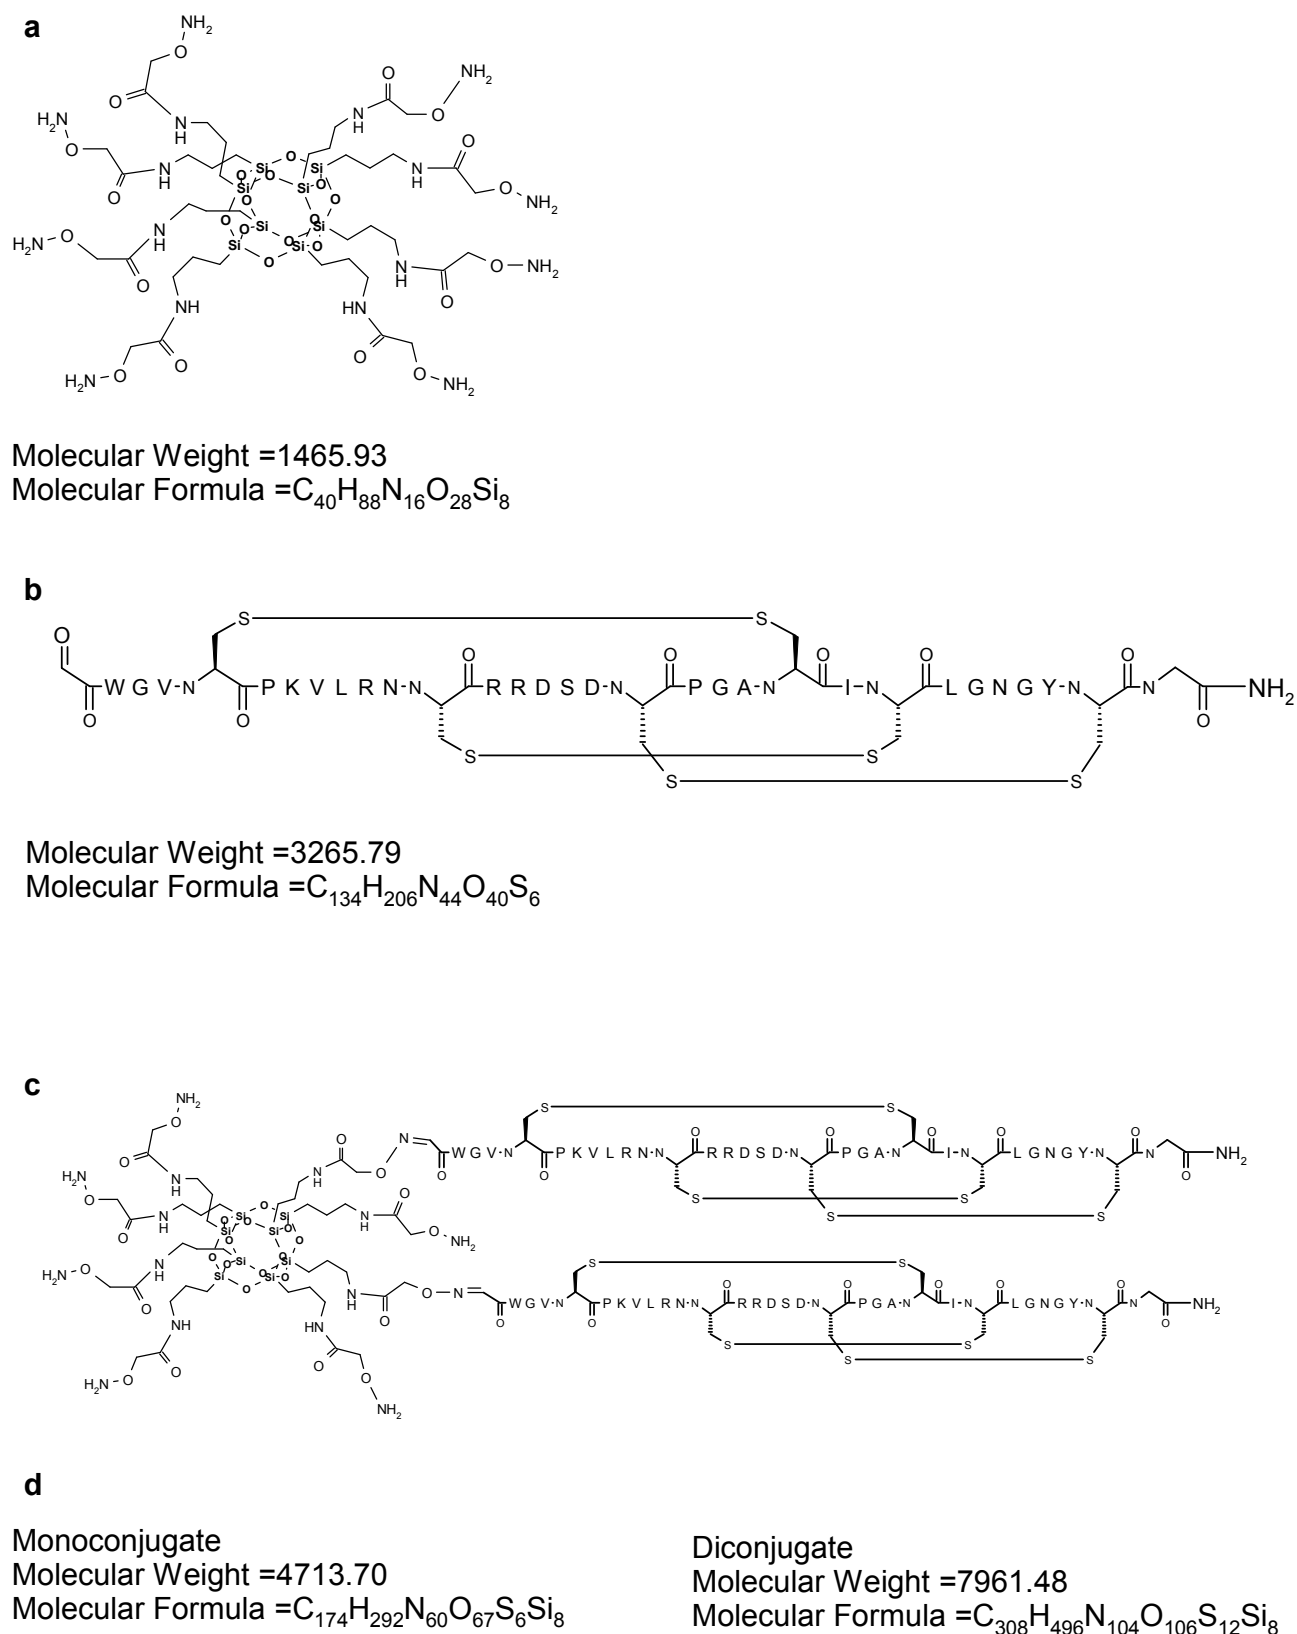

**Fig. S22:** (a) unprotected aminoxy COSS particle, (b) periodate oxidized **p8**, (c) possible conjugation products **8**.



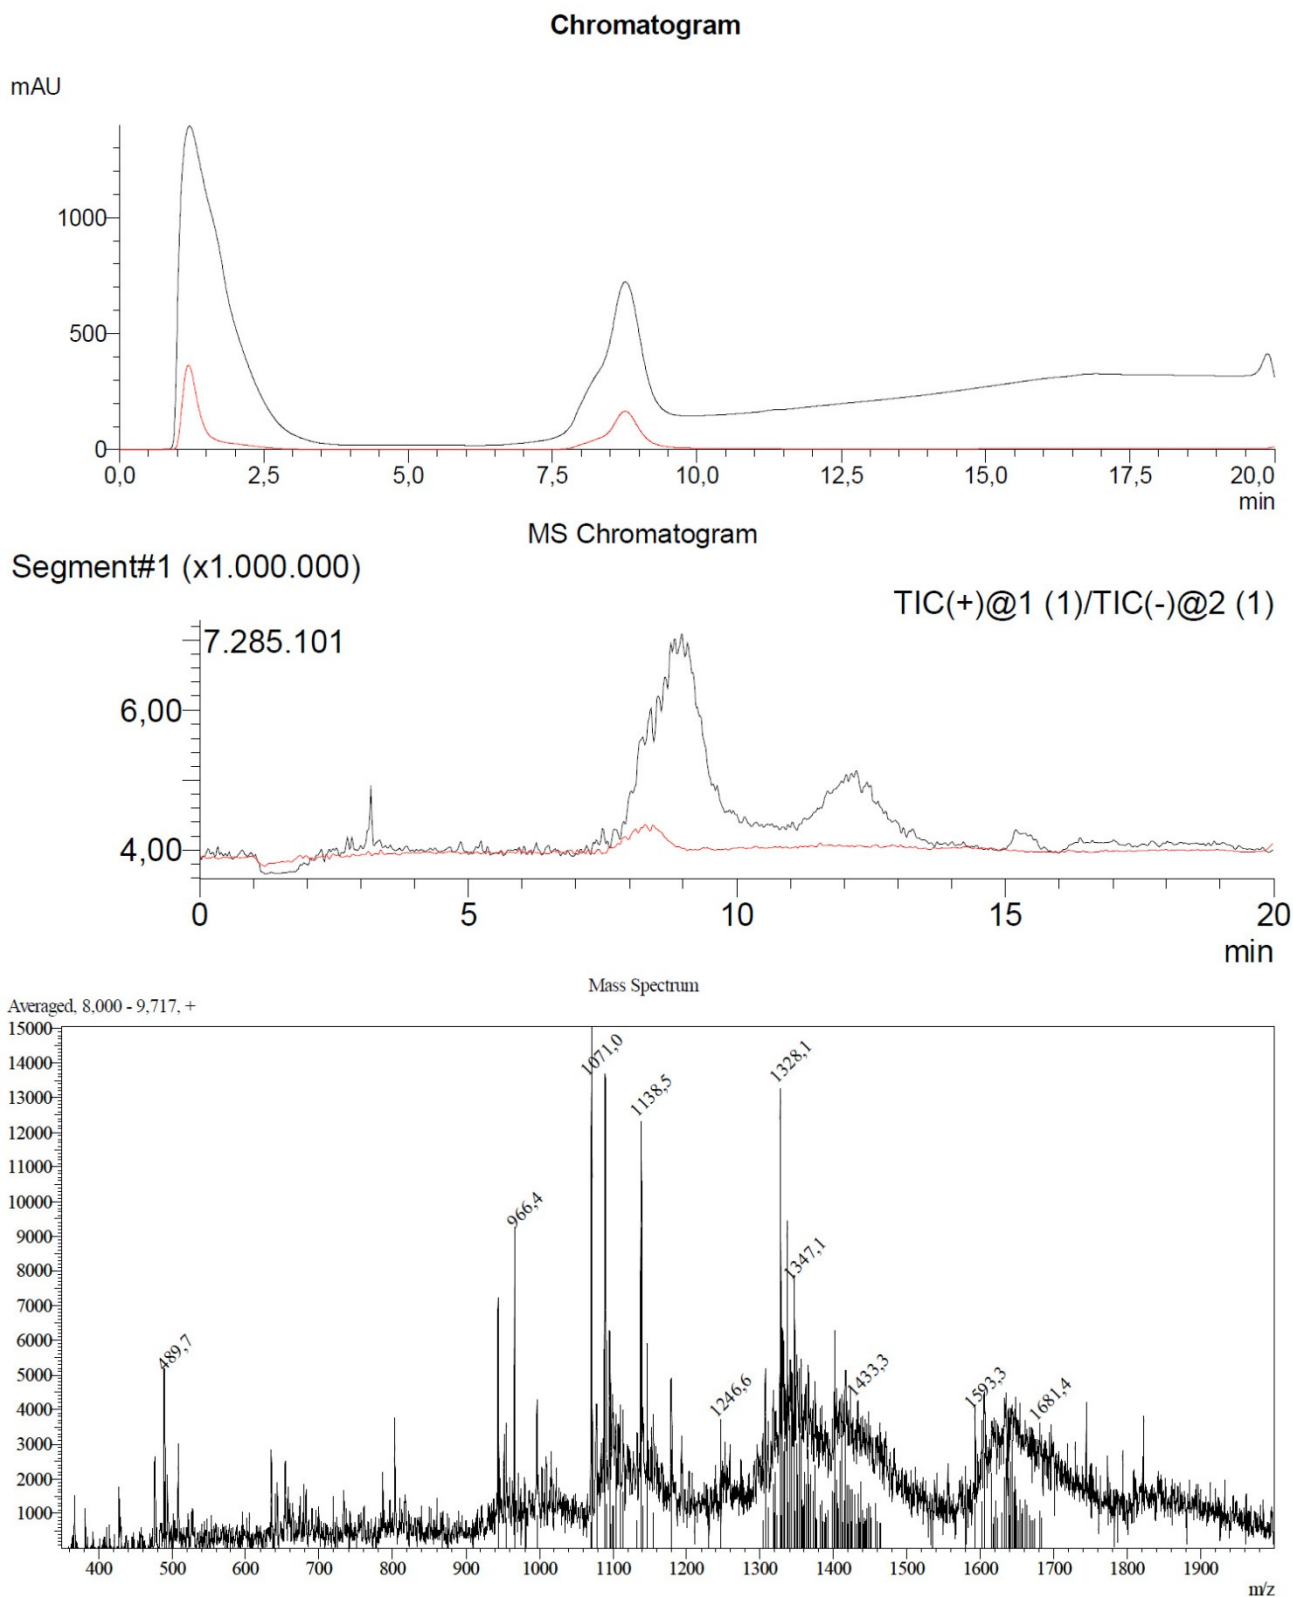

**Fig. S23:** LC-MS monitoring of the synthesis of **8**: analysis after overnight reaction.



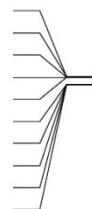

Molecular Weight = 7961.48  
Molecular Formula = C308H496N104O106S12Si8

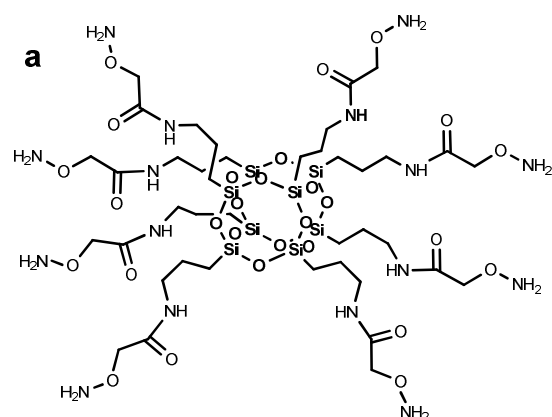

Chemical Formula:  $C_{40}H_{88}N_{16}O_{28}Si_8$   
Molecular Weight: 1465.901465.9011

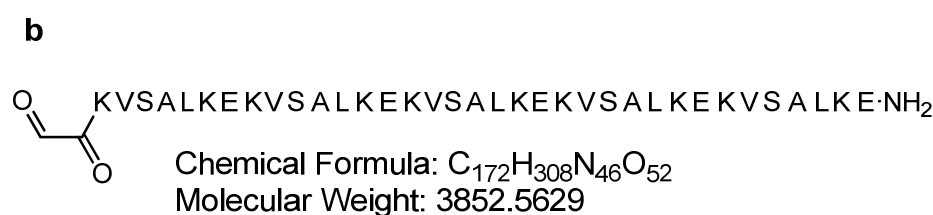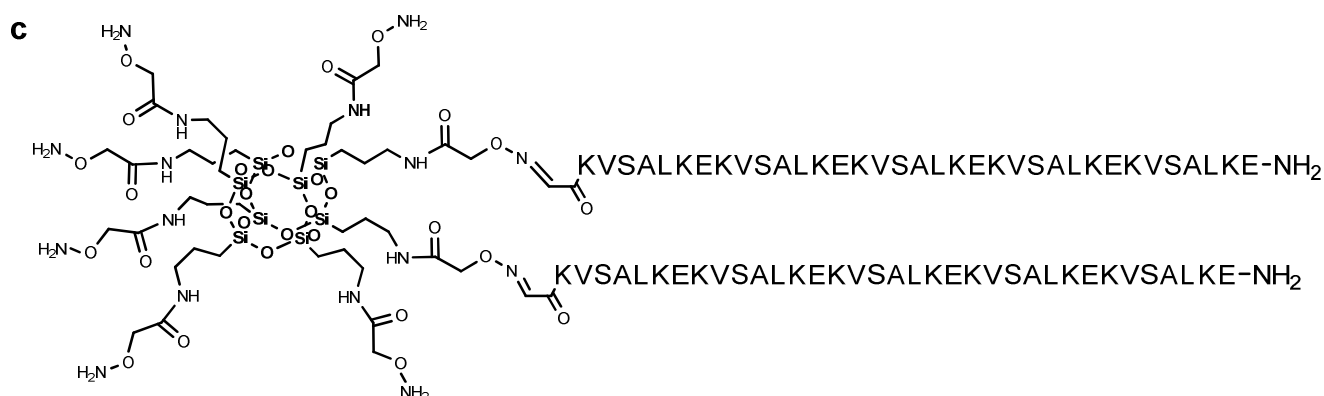

**d**

Monoconjugate  
Chemical Formula:  $C_{212}H_{394}N_{62}O_{79}Si_8$   
Molecular Weight: 5300.44

Diconjugate  
Chemical Formula:  $C_{384}H_{700}N_{108}O_{130}Si_8$   
Molecular Weight: 9134.99

5 **Fig. S25:** (a) unprotected aminoxy COSS particle, (b) periodate oxidized **p9**, (c) possible conjugation products **9**.

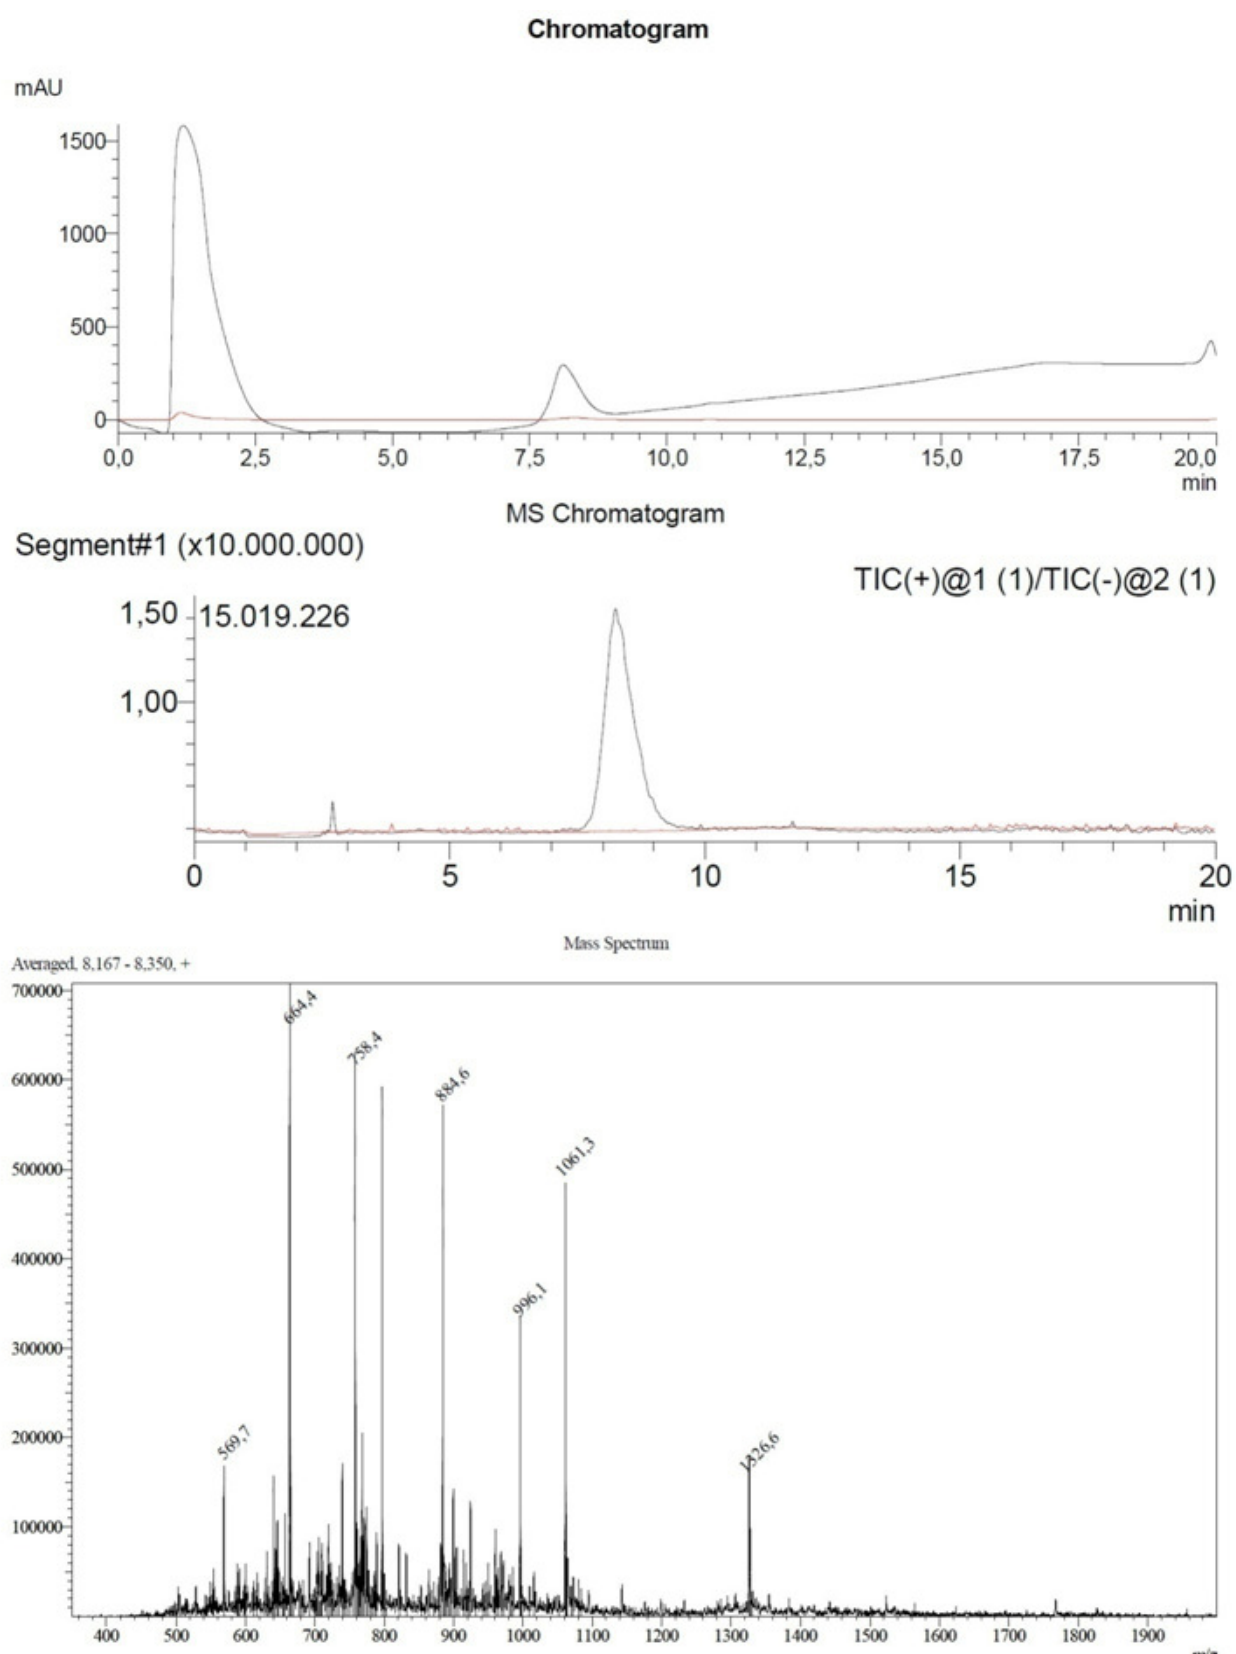

**Fig. S26:** LC-MS monitoring of the synthesis of **9**: analysis after overnight reaction.

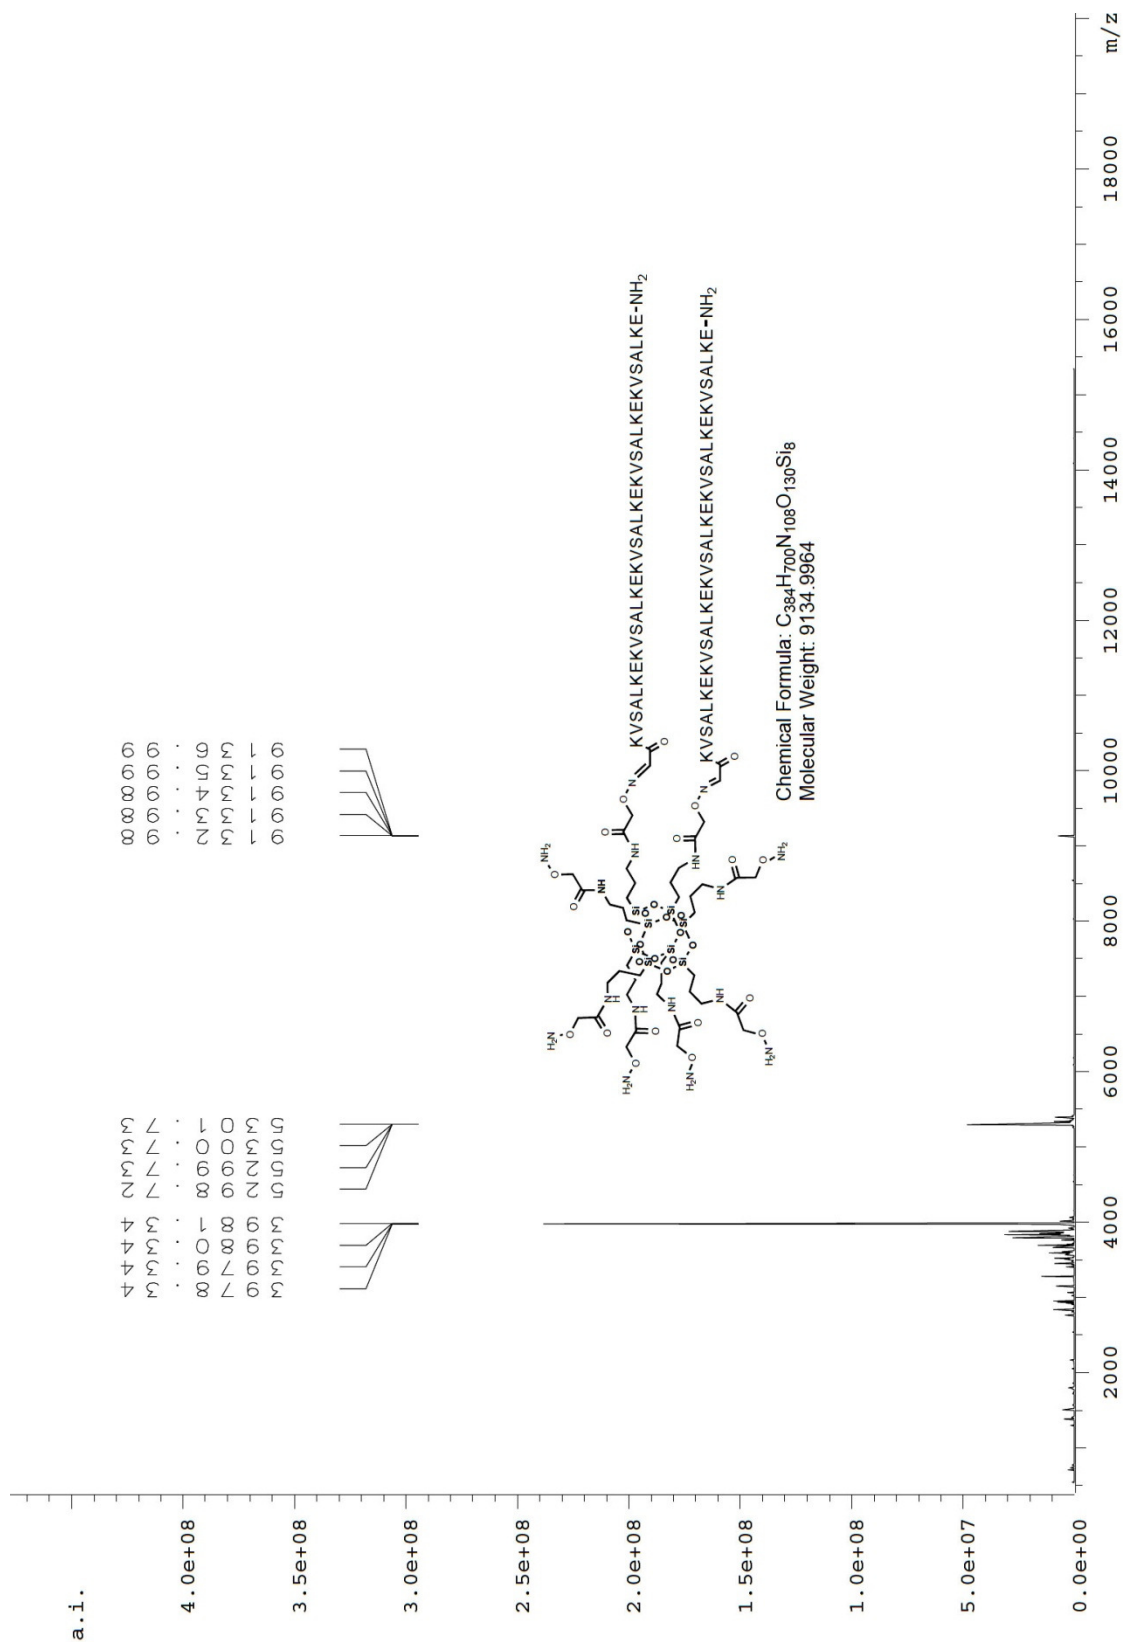

Fig. S27: Synthesis of **9**: deconvoluted ESI MS spectrum of the reaction mixture.
